1 **The oxysterol synthesizing enzyme CH25H contributes to the development of intestinal**  
2 **fibrosis**

3 T. Raselli<sup>1</sup>, A. Wyss<sup>1</sup>, M.N. Gonzalez Alvarado<sup>1</sup>, B. Weder<sup>1</sup>, C. Mamie<sup>1</sup>, M.R. Spalinger<sup>1</sup>, W.  
4 T. van Haaften<sup>1,2</sup>, G. Dijkstra<sup>2</sup>, A.W. Sailer<sup>3</sup>, P.H. Imenez Silva<sup>4</sup>, C.A. Wagner<sup>4</sup>, V.  
5 Tosevski<sup>5</sup>, Sebastian Leibl<sup>6</sup>, M. Scharl<sup>1</sup>, G. Rogler<sup>1</sup>, M. Hausmann<sup>1\*</sup> and B. Misselwitz<sup>1\*</sup>

6 <sup>1</sup> Department of Gastroenterology and Hepatology, University Hospital Zurich, Zurich University, Zurich,  
7 Switzerland

8 <sup>2</sup> Department of Gastroenterology and Hepatology, University Medical Center Groningen, University of  
9 Groningen, Groningen, the Netherlands

10 <sup>3</sup> Chemical Biology & Therapeutics, Novartis Institutes for BioMedical Research, Basel, Switzerland

11 <sup>4</sup> Institute of Physiology, Zurich University, Zurich, Switzerland

12 <sup>5</sup> Mass Cytometry Facility, Zurich University, Zurich, Switzerland

13 <sup>6</sup> Institute of Pathology and Molecular Pathology, University Hospital Zurich and Zurich University, Zurich,  
14 Switzerland

15 \* MH and BM contributed equally to this work

16 Running title: CH25H in intestinal fibrosis

17

18 **Corresponding Author:**

19 Benjamin Misselwitz

20 Division of Gastroenterology and Hepatology

21 University Hospital Zurich and University of Zurich

22 Rämistr. 100, 8091 Zurich

23 CH-Switzerland

24 Mail: [benjamin.misselwitz@usz.ch](mailto:benjamin.misselwitz@usz.ch)

25 Fax: +41 44 255 44 74

26 Tel.: +41 44 255 11 11

27 **Word count:** 4709

28

29 **Abbreviations:** CD: Crohn's disease, CH25H: cholesterol 25-hydroxylase, COL: collagen,  
30 COPD: chronic obstructive pulmonary disease DSS: dextran sodium sulfate, ECM:  
31 extracellular matrix, GAPDH: glyceraldehyde 3-phosphate dehydrogenase, HC:  
32 hydroxycholesterol, HYP: hydroxyproline, IBD: Inflammatory bowel disease, IL: interleukin,  
33 LPS: lipopolysaccharide, MMP: matrix metalloproteinase, SMA: smooth muscle actin, TGF:  
34 transforming growth factor, TIMP: tissue inhibitor of metalloproteinases, TLR: toll like  
35 receptor, UC: ulcerative colitis, WT: wildtype

36 **Abstract**

37 Intestinal fibrosis and stenosis are common complications of Crohn's disease (CD), frequently  
38 requiring surgery. Anti-inflammatory strategies can only partially prevent fibrosis; hence,  
39 anti-fibrotic therapies remain an unmet clinical need. Oxysterols are oxidized cholesterol  
40 derivatives, with important roles in various biological processes. The enzyme cholesterol 25-  
41 hydroxylase (CH25H) converts cholesterol to 25-hydroxycholesterol (25-HC), which  
42 modulates immune responses and oxidative stress. In human intestinal samples from CD  
43 patients we found a strong correlation of *CH25H* mRNA expression with the expression of  
44 fibrosis markers. We demonstrate reduced intestinal fibrosis in mice deficient for the CH25H  
45 enzyme using the sodium dextran sulfate (DSS)-induced chronic colitis model. Additionally,  
46 using a heterotopic transplantation model of intestinal fibrosis, we demonstrate reduced  
47 collagen deposition and lower concentrations of hydroxyproline in CH25H knockouts. In the  
48 heterotopic transplant model, CH25H was expressed in fibroblasts. Taken together, our  
49 findings indicate an involvement of oxysterol synthesis in the pathogenesis of intestinal  
50 fibrosis.

51

52 **Keywords:** Fibrogenesis, intestinal fibrosis, cholesterol 25 hydroxylase (Ch25h), oxysterols,  
53 transplantation, graft, mouse model

54

## 55 **Introduction**

56 Crohn's disease (CD) is a major form of inflammatory bowel disease (IBD), characterized by  
57 chronic discontinuous inflammatory lesions. Inflammation in CD is typically transmural and  
58 can affect the whole gastrointestinal tract with a preference for the small intestine. Common  
59 complications in CD patients include perforations of the gut wall (fistulae and abscesses) as  
60 well as intestinal fibrosis and strictures with narrowing of the intestinal lumen. More than  
61 60% of CD patients have to undergo surgery within 20 years following the initial diagnosis[1]  
62 and recurrent disease requires more surgical procedures in at least 50% of the patients after  
63 the first operation[2, 3]. The second major form of IBD, ulcerative colitis (UC), characterized  
64 by continuous inflammatory lesions of the colon, has once been considered a non-fibrotic  
65 disease, but recent evidence indicates some degree of submucosal fibrosis in up to 100% of  
66 UC colectomy specimens[4, 5] and the degree of fibrosis seems to be proportional to the  
67 degree of chronic but not active inflammation[6].

68 Currently, no drugs have been approved for treatment or prevention of intestinal fibrosis[7, 8].  
69 Anti-inflammatory medications including anti-tumour necrosis factor (TNF) antibodies or  
70 immunosuppressants, are only partially effective in preventing fibrosis[9] and new preventive  
71 and therapeutic strategies are therefore urgently needed.

72 On a molecular level, fibrosis is characterized by excessive accumulation of extracellular  
73 matrix (ECM) components including collagen and laminin, replacing the original tissue and  
74 leading to stiffening and loss of normal function[10, 11]. Transforming growth factor- $\beta$   
75 (TGF)- $\beta$  is a key driver of fibrosis, promoting differentiation of fibroblasts to myofibroblast,  
76 indicated by expression of  $\alpha$ -smooth muscle actin (SMA)[12, 13]. Myofibroblasts are the  
77 main effector cells for fibrosis and mainly responsible for ECM deposition[14-16]. On the  
78 other hand, myofibroblasts also synthesize matrix metalloproteinases (MMPs) as ECM  
79 degrading enzymes and their inhibitors (tissue inhibitor of MMPs, TIMP). Myofibroblasts can

80 derive from the local fibroblast pool; however, epithelial, endothelial, hematopoietic cells, or  
81 pericytes can also differentiate into myofibroblasts[16]. Nevertheless, the chain of events  
82 leading to intestinal fibrosis is insufficiently understood.

83 Studying the pathophysiology of intestinal fibrosis has been limited by the lack of a *bona fide*  
84 animal model. Chronic dextran sodium sulfate (DSS) colitis is frequently used as a fibrosis  
85 model [17, 18], even though key aspects of CD associated intestinal fibrosis, such as  
86 occlusion of the intestinal lumen are not observed in this model. Recently, we established and  
87 characterized a murine heterotopic transplant model, where small intestinal sections are  
88 transplanted into the neck fold of recipient mice[19, 20]. In the transplanted sections, the  
89 lumen progressively occludes, accompanied by expression of TGF- $\beta$  and  $\alpha$ -SMA, as well as  
90 collagen deposition in the extracellular matrix. In this model, we previously demonstrated that  
91 pirfenidone, an anti-inflammatory and anti-fibrotic drug approved for the treatment of  
92 idiopathic pulmonary fibrosis, was able to reduce fibrosis[20].

93 Oxysterols are increasingly recognized as immune-modulatory molecules. 25-  
94 hydroxycholesterol (25-HC) is part of the rapid innate immune response and an efficient  
95 defence molecule. 25-HC can induce macrophage activation[21-23], T cell  
96 differentiation[24], production of IL-8[25-27] as well as IL-6[23] and was shown to have  
97 strong antiviral activity against many enveloped viruses[28-30]. Furthermore, Dang and  
98 colleagues recently demonstrated a critical role of 25-HC in inhibiting activation of the DNA  
99 sensor protein AIM2, preventing spurious AIM2 inflammasome activation[31]. Cholesterol  
100 25-hydroxylase (CH25H) is the key enzyme mediating hydroxylation of cholesterol to 25-  
101 HC[32]. 25-HC is rapidly produced *in vivo* upon immune stimulation by toll like receptor  
102 (TLR) agonists including lipopolysaccharide (LPS) and poly(I:C)[28, 30, 33, 34]. 25-HC  
103 production was shown to be increased in the airways of patients with chronic obstructive  
104 pulmonary disease (COPD) and correlated with the degree of neutrophilic infiltration[35]. 25-

105 HC can be further hydroxylated to di-hydroxy cholesterol (e.g. 7 $\alpha$ , 25-HC) which have been  
106 shown to act as chemoattractants for cells of the adaptive and innate immune system[36, 37].  
107 Recently, CH25H expression was shown to be upregulated in primary lung fibroblasts in  
108 response to activated eosinophils, suggesting CH25H activation in chronic lung diseases  
109 including COPD[38]. Pro-fibrotic effects of the CH25H product 25-HC have been  
110 demonstrated *in vitro*: In a tissue culture model using human fetal lung fibroblasts (HLF), 25-  
111 HC induced nuclear factor- $\kappa$ B (NF- $\kappa$ B) activation with subsequent release of TGF- $\beta$ , leading  
112 to myofibroblast formation, MMP-2 and 9 release, SMA expression and collagen  
113 production[39]. However, the role of 25-HC in intestinal inflammation and fibrosis has not  
114 been addressed. In this study, we aimed to investigate the role of the enzyme CH25H in the  
115 development of intestinal fibrosis.  
116

## 117 **Results**

### 118 ***CH25H* mRNA expression is a marker of fibrosis in intestinal samples of CD patients**

119 To test for a role of the oxysterol synthesizing enzyme CH25H in CD associated fibrosis,  
120 *CH25H* mRNA expression was measured in human intestinal surgical samples. We  
121 investigated terminal ileum samples from CD patients undergoing ileocecal resection due to  
122 stenosis. Samples macroscopically affected by fibrosis were compared to the proximal ileal  
123 resection margin which showed no macroscopic signs of fibrosis or inflammation. Healthy  
124 tissue from cancer-free resection margins of colon adenocarcinoma patients undergoing right-  
125 sided hemicolectomy was used as additional control (Table 1). Representative Sirius red  
126 staining pictures illustrate increased collagen deposition in fibrotic areas of CD patients  
127 (Figure 1A). We observed a gradual increase of *CH25H* mRNA expression from control  
128 tissue to non-fibrotic CD tissue and to fibrotic areas from the same patients ( $p < 0.05$ , Figure  
129 1B). Thereby, mRNA levels of *CH25H* strongly correlated with the expression levels of  
130 fibrosis markers including *COL-1* and *-3*, *SMA* and *TGF- $\beta$*  (Figure 1C-F), confirming the  
131 association of CH25H expression with intestinal fibrosis in the human intestine.

### 132 **Reduced intestinal fibrosis in mice with deficient 25-hydroxycholesterol synthesis**

133 To further investigate the role of CH25H in intestinal fibrosis, we investigated whether  
134 absence of CH25H would reduce fibrosis in dextran sodium sulfate (DSS)-induced chronic  
135 colitis, a well-established model of intestinal inflammation, typically associated with high  
136 levels of intestinal fibrosis [17, 18]. For this aim, we induced chronic colon inflammation and  
137 fibrosis in WT and *Ch25h*<sup>-/-</sup> littermate mice with four cycles of 7 days 2.5% DSS in drinking  
138 water followed by a 10-day recovery period with normal drinking water. Collagen deposition  
139 was determined by Sirius red staining and analysis under transmission light microscopy  
140 (Figure 2A). The collagen layer was significantly thinner in *Ch25h*<sup>-/-</sup> mice compared to WT

141 littermate controls (Figure 2B, water animals: WT:  $8.5 \mu\text{m} \pm 2.1$ , *Ch25h*<sup>-/-</sup>:  $8.7 \mu\text{m} \pm 0.8$  n.s.,  
142 DSS animals: WT:  $22.4 \mu\text{m} \pm 7.2$ , *Ch25h*<sup>-/-</sup>:  $11.7 \mu\text{m} \pm 2.6$ ,  $p = 0.008$ ). Reduced collagen  
143 deposition in *Ch25h* knockout mice was confirmed by automated quantification of the  
144 collagen layer area (Figure 2C). Additionally, mRNA expression levels for fibrosis markers  
145 such as *Tgf- $\beta$* , collagen type 3 (*Col-3*) and *Timp-1* were significantly lower in the colon of  
146 *Ch25h*<sup>-/-</sup> animals and a clear trend for lower mRNA expression of collagen type 1 (*Col-1*) and  
147 lysyl oxidase homolog 2 (*Loxl-2*) in CH25H-deficient mice was found (Figure 2D-H).  
148 Expression levels of *Ch25h* were increased in DSS treated animals compared to water  
149 controls (Figure 2I).  
150 Of note, thinner collagen layer and lower expression levels of fibrosis markers (*Tgf- $\beta$* , *Col-3*  
151 and *Timp-1*) upon *Ch25h* knockout were not due to reduced inflammation: when colon  
152 inflammation was analysed in H/E stained colon sections, the histology score quantifying the  
153 inflammatory infiltrate and the epithelial damage, was even higher in *Ch25h*<sup>-/-</sup> mice compared  
154 to WT littermates (Figure 3A). Further, macroscopic aspects of intestinal inflammation such  
155 as the murine endoscopic index of colitis severity (MEICS) and spleen weight did not differ  
156 between both genotypes (Figure 3B). In summary, in chronic DSS colitis, intestinal collagen  
157 deposition was reduced in the absence of CH25H, independent from effects of CH25H  
158 knockout on intestinal inflammation.

159 **Reduced intestinal fibrosis in the absence of CH25H in a heterotopic transplant model of**  
160 **intestinal fibrosis**

161 To confirm a role of CH25H in intestinal fibrosis in an inflammation-independent model, we  
162 employed a recently developed heterotopic transplant model of intestinal fibrosis[19, 20].  
163 Sections of small intestine from either CH25H knockout (*Ch25h*<sup>-/-</sup>) mice or their wildtype  
164 littermate controls (WT), were transplanted subcutaneously into the neck of recipient mice of  
165 the same genotype[19, 20]. Non-transplanted small bowel sections from *Ch25h*<sup>-/-</sup> mice and



166 WT littermates were used as controls (day 0). Seven days after surgery, the intestinal grafts  
167 were collected for analysis (day 7) and collagen deposition was determined by Sirius red  
168 staining under transmission light microscopy. At baseline (day 0), cross sections of WT and  
169 *Ch25h*<sup>-/-</sup> were histologically indistinguishable with intact epithelial crypts and a thin collagen  
170 layer. 7 days post-transplantation, destruction of intestinal epithelial layer, occlusion of the  
171 intestinal lumen and a significantly thicker collagen layer was observed[19, 20] (Figure 4A).

172 The development of intestinal fibrosis was significantly reduced in mice deficient for CH25H  
173 indicated by a significantly thinner collagen layer compared to WT littermate controls (Figure  
174 4A, B; day 0: WT: 8.5  $\mu\text{m} \pm 0.7$ , *Ch25h*<sup>-/-</sup>: 8.3  $\mu\text{m} \pm 1.5$  n.s., day 7: WT 15.0  $\mu\text{m} \pm 3.1$ ,  
175 *Ch25h*<sup>-/-</sup>: 12.1  $\mu\text{m} \pm 2.3$ , p= 0.01). A thinner collagen deposition in *Ch25h* knockout mice was  
176 confirmed by polarized light microscopy with automated image analysis and quantification of  
177 the collagen layer area (Figure 4C, D). Furthermore, concentration of the collagen metabolite  
178 hydroxyproline was significantly lower in *Ch25h* knockout intestinal transplants compared to  
179 WT littermate controls (Figure 4E).

180 *Ch25h* mRNA expression was significantly increased in fibrotic small bowel resections 7  
181 days after transplantation compared to freshly isolated intestine (Figure 5A). Similarly,  
182 fibrosis markers including *Col-1* and *Col-3*, *Timp-1* and *Loxl-2* were induced 7 days after  
183 transplantation compared to day 0 (Figure 5B-D). *Ch25h*<sup>-/-</sup> animals displayed a non-  
184 significant trend for reduced expression of fibrosis markers compared to WT controls at day 7  
185 (Figure 5B-D). TGF- $\beta$  protein levels were decreased in *Ch25h* knockout as compared to WT  
186 mice, in line with reduced stimulation of profibrotic pathways upon CH25H deficiency  
187 (Figure 5E-F). Thus, in agreement with the DSS-induced chronic colitis model, our  
188 heterotopic transplant model confirms reduced intestinal fibrosis in the absence of CH25H.

189 **Recruitment of immune cells into fibrotic small intestine in wildtype and *Ch25h*<sup>-/-</sup>**  
190 **animals**

191 To address changes in immune cells infiltrating the intestinal grafts, lamina propria  
192 mononuclear cells were isolated from the grafts 7 days after surgery and an explorative mass  
193 cytometry (Cytometry by Time of Flight, CyTOF) analysis with a broad marker panel (Table  
194 2) was performed. Cells were automatically clustered based on similarity of surface marker  
195 expression. The immune cell infiltrate was dominated by neutrophils, with a lower fraction of  
196 T cells, dendritic cells, monocytes and NK cells (Figure 6A, B). No significant differences  
197 between WT and *Ch25h*<sup>-/-</sup> animals were detected for the investigated immune cell populations  
198 (Figure 6C). Additionally, histological analysis of IL-17 revealed no differences in IL-17  
199 expression between WT and *Ch25h*<sup>-/-</sup> grafts (Supplementary Figure 1).

200 To determine the location of *Ch25h* mRNA expression in the small intestine, RNA *in situ*  
201 hybridization using fixed-frozen sections of intestinal grafts and freshly isolated intestines  
202 was performed. *Ch25h* mRNA expression was detected in freshly isolated intestines from WT  
203 mice and the graft at 7 days after transplantation (Figure 7A, B, Supplementary Figure 2). The  
204 *Ch25h* signal appears to be cytoplasmic with the formation of small clusters. *Ch25h*  
205 expression was observed in fibroblasts demarcating the necrotic former mucosa layer, but  
206 remains of epithelial crypts were not found in the demarcation zone. The *Ch25h*-expressing,  
207 spindle shaped fibroblasts are arranged in a band-like fascicle with large ovoid nuclei  
208 exhibiting a thinly dispersed chromatin structure and a delicate nuclear membrane without the  
209 indentations typically found in the nuclei of histiocytes (Figure 7B, arrows). In contrast,  
210 *Ch25h* is not expressed in the inflammatory infiltrate, which mainly consists of neutrophils  
211 showing characteristic segmented nuclei (Figure 7B, double arrows). No *Ch25h* expressing  
212 lymphocytes were found.

213 **25-HC does not induce myofibroblast differentiation *in vitro***

214 To address direct effects of the CH25H product 25-HC on fibroblasts, we performed cell  
215 culture experiments using primary murine intestinal fibroblasts using a protocol similar to a  
216 previous study in a human lung fetal fibroblast cell line (HFL-1) [39]. Addition of TGF- $\beta$   
217 resulted in increased  $\alpha$ -SMA protein expression in intestinal fibroblasts. In contrast, exposure  
218 to 25-HC did not affect  $\alpha$ -SMA expression at physiological 25-HC concentrations of 0.001-  
219 0.1  $\mu$ M (Figure 7C). Similarly, addition of 25-HC to 3T3 cells did not cause a significant  
220 increase of  $\alpha$ -SMA expression at concentrations of 0.001-0.1  $\mu$ M (Figure 7C).

## 221 **Discussion**

222 In this study, we demonstrate a role of the oxysterol synthesizing enzyme CH25H in the  
223 pathogenesis of intestinal fibrosis. mRNA expression of *CH25H* was upregulated in human  
224 intestinal fibrotic tissue of CD patients compared to healthy controls and we found a positive  
225 correlation between expression of various fibrosis mediators and *CH25H* expression. Further,  
226 we demonstrate a contribution of CH25H to the development of intestinal fibrosis in two  
227 murine fibrosis models: in the DSS-induced colitis model, which is commonly used as a  
228 model of chronic intestinal inflammation and fibrosis[17, 18], mice lacking the CH25H  
229 enzyme showed less collagen deposition and lower mRNA levels of fibrosis mediators. In the  
230 recently developed heterotopic transplantation model, lack of CH25H also reduced intestinal  
231 collagen deposition as well as levels of the collagen metabolite HYP and the crucial pro-  
232 fibrotic factor TGF- $\beta$ [40, 41].

233 In several aspects, the newly developed heterotopic transplantation model complements the  
234 established DSS-induced chronic model. In the DSS-induced model, fibrosis is induced by  
235 repeated disruption of the integrity of the mucosal barrier, resulting in bacterial translocation  
236 and lymphocyte infiltration, which promotes chronic colon inflammation. In contrast, in the  
237 heterotopic transplantation model, fibrosis is associated with ischemia and hypoxia,  
238 independent from inflammatory processes. Here, fibrosis is reliably induced within 7 days  
239 after transplantation. This new model reflects important aspects of the human disease such as  
240 occlusion of the lumen, expression of TGF- $\beta$  and  $\alpha$ -SMA, as well as collagen deposition in  
241 the extracellular matrix[20]. Bacterial translocation and the pathogen associated molecular  
242 pattern (PAMP)-associated signalling is not a prerequisite of fibrosis in this model as collagen  
243 deposition is also increased following transplantation of small bowel from germfree mice and  
244 MyD88 deficient mice (M. Hausmann unpublished observations). In the heterotopic  
245 transplant model, fibrosis is also observed in the absence of B and T cells in RAG2 deficient

246 mice (M. Hausmann, unpublished observations). Robust reduction of fibrosis upon CH25H  
247 knockout in two independent fibrosis models clearly strengthens the validity of our findings.  
248 Our data demonstrate *Ch25h* expression in local fibroblasts in intestinal grafts, which  
249 potentially leads to local 25-HC production by fibroblasts. However, it remains unclear,  
250 which cell(s) respond to 25-HC during fibrosis induction. In a previous *in vitro* study, 25-HC  
251 induced nuclear factor- $\kappa$ B (NF- $\kappa$ B) activation, subsequent release of TGF- $\beta$  in human fetal  
252 lung fibroblasts, ultimately leading to  $\alpha$ -SMA expression and myofibroblast  
253 differentiation[39]. In support of this finding, activation of NF- $\kappa$ B by 25-HC was also  
254 demonstrated in primary rat hepatocytes and in a human monocytic cell line[42, 43].  
255 However, in our study, addition of 25-HC to 3T3 fibroblasts or primary murine intestinal  
256 fibroblasts failed to induce  $\alpha$ -SMA expression. Therefore, in the intestine, cells different from  
257 fibroblasts might be responsible for TGF- $\beta$  production upon 25-HC exposure.  
258 Previous reports demonstrated that 25-HC inhibits Th17 cell differentiation[24, 44], and  
259 *Ch25h* knockout mice have higher numbers of Th17 cells in peripheral lymph nodes and the  
260 spleen[45]. Th17 derived IL-17 is a key driver of fibrosis in different organs, including the  
261 gut[46-48]. However, histological analysis and quantification of IL-17 revealed no differences  
262 between WT and *Ch25h*<sup>-/-</sup> intestinal grafts. In line with these results, the number of CD4  
263 positive cells in grafts from WT and *Ch25h* knockout animals was similar. Overall, the  
264 inflammatory infiltrate in intestinal grafts could not be distinguished between mice of both  
265 genotypes, which is well in line with involvement of CH25H in profibrotic pathways  
266 independent from intestinal inflammation. Our analysis revealed no decrease in intestinal  
267 inflammation between wildtype and *Ch25h*<sup>-/-</sup> littermate controls in chronic DSS colitis (Figure  
268 3) and acute DSS colitis (unpublished observations), which further supports that CH25H  
269 affects fibrosis in an inflammation-independent manner.

270 The CH25H product 25-HC has been shown to modulate several immune responses[21, 23,  
271 25, 28, 29, 33]. 25-HC acts as an acute defence molecule and a master regulator of  
272 inflammation by increasing antiviral responses[28-30, 49] and decreasing antibacterial  
273 defence mechanisms[33, 44]. Our study suggests an additional role of the oxysterol 25-HC as  
274 a mediator of intestinal fibrosis. The induction of wound healing, which potentially leads to  
275 fibrosis, might thus start very early in the inflammatory cascade by the acute immune-  
276 modulatory activity of 25-HC, which is rapidly induced after an inflammatory stimulus[50].  
277 Despite advances in the treatment of CD associated inflammation, a specific intestinal anti-  
278 fibrotic therapy remains an unmet clinical need [7, 8]. Our findings clearly indicate that the  
279 hydroxylase CH25H is involved in intestinal fibrosis, making CH25H a potential promising  
280 novel therapeutic target to prevent intestinal fibrosis, but additional studies are required to  
281 elucidate the exact mechanism how CH25H promotes fibrosis.

282

## 283 **Materials and Methods**

### 284 **Human tissue from patients with CD and controls**

285 Intestinal tissue was obtained from patients with CD undergoing ileocecal resection due to  
286 stenosis in the terminal ileum. Non-fibrotic samples originate from the margin of the  
287 resections and fibrotic samples from the thickened fibrosis-affected region. Healthy control  
288 samples were obtained from patients undergoing right-sided hemicolectomy due to  
289 adenocarcinoma (non-cancer affected ileal resection margin). Immediately after resection,  
290 samples were fixed in Tissue-Tek® (O.C.T. Compound, Sakura® Finetek), frozen in  
291 isopentane on dry ice and stored at -80°C for RNA extraction.

### 292 **Animals**

293 CH25H-deficient mice ( $Ch25h^{-/-}$ ) in a C57BL/6 background were kindly provided by Novartis  
294 Institutes for BioMedical Research[33] and bred in our animal facility with C57BL/6 mice to  
295 generate  $Ch25h^{+/-}$  mice.  $Ch25h^{+/-}$  were then crossed to obtain  $Ch25h^{-/-}$  and  $Ch25h^{+/+}$   
296 (wildtype) littermates. The animals received standard laboratory mouse food and water *ad*  
297 *libitum*. They were housed under specific pathogen-free (SPF) conditions in individually  
298 ventilated cages. 7- to 10-week old female littermates were used for all studies.

### 299 **DSS-induced chronic colitis**

300 DSS-induced chronic colitis was induced by administration of 4 cycles of treatment with DSS  
301 (MP Biomedicals). Every cycle consisted of 7 days of 2.5% DSS followed by 10 days of  
302 normal drinking water. Mice were killed 4 weeks after the last DSS cycle. Colonoscopy was  
303 scored using the murine endoscopic index of colitis severity (MEICS) scoring system [51].  
304 Histological scoring was performed on H&E-stained distal colon sections as described  
305 previously [51, 52].

### 306 **Heterotopic intestinal transplant model**

307 The heterotopic mouse intestinal transplant model is an adaptation of the transplantation  
308 model of intestinal fibrosis in rats, which have both been described in detail previously[19,  
309 20]. Briefly, donor small bowel was resected and transplanted subcutaneously into the neck of  
310 a recipient animal of the same gender and genotype. A single dose of Cefazolin (Kefzol, 1g  
311 diluted in 2.5 ml aqua dest.) was applied i.p. as infection prophylaxis. The time interval  
312 between graft resection and subsequent implantation was less than 15 minutes. No anesthesia-  
313 related recipient death, post-transplantation recipient death or evidence of infection was  
314 observed in any of the animals. Intestinal grafts were removed seven days after  
315 transplantation. At explantation, each graft was divided into three equal segments. One  
316 segment was fixed in 4% formalin and prepared for histopathological assessment. The  
317 remaining segments were snap frozen in liquid nitrogen and stored at -80°C for RNA  
318 extraction and hydroxyproline (HYP) assay, respectively.

319 For each sample, 10 mg of snap frozen tissue was homogenized with 100 µl of ultrapure  
320 water in M tubes (Miltenyi Biotec) using a gentleMACS tissue homogenizer (Miltenyi  
321 Biotec). Graft collagen content was evaluated using the HYP Assay Kit (Sigma-Aldrich)  
322 according to the manufacturer's instructions. HYP concentration is determined by the reaction  
323 of 4-(Dimethylamino)benzaldehyde (DMAB) with oxidized HYP, resulting in a colorimetric  
324 product (560 nm), proportional to the presence of HYP. All samples and standards were run in  
325 duplicate and absorbance at 560 nm was detected on a SpectraMax M2 fluorescence  
326 microplate reader using SoftMax Pro version 5 Software (Molecular Devices).

### 327 **RNA isolation, cDNA synthesis and real-time-PCR**

328 Total RNA was isolated using the RNeasy Plus Mini Kit (QIAGEN). For mouse samples,  
329 lysis buffer from the kit was added to snap frozen resections, and samples were shredded in M



330 tubes (Miltenyi Biotec) in a gentleMACS tissue homogenizer (Miltenyi Biotec). For human  
331 samples 10  $\mu$ m thick tissue tek sections, containing the full thickness of the intestinal wall  
332 (confirmed by H/E staining), were cut using a cryostat. Sections were dissolved in TRIzol  
333 (Invitrogen, Life Technologies). Total RNA was prepared according to the manufacturer's  
334 instructions. On-column DNase digestion with RDD buffer (QIAGEN) was performed for 15  
335 min at room temperature. RNA concentration was determined by absorbance at 260 and 280  
336 nm. Complementary DNA (cDNA) synthesis was performed using a High-Capacity cDNA  
337 Reverse Transcription Kit (Applied Biosystems) following the manufacturer's instructions.  
338 Real-time PCR was performed using the TaqMan Fast Universal Master Mix (Applied  
339 Biosystems) on a Fast 7900HT Real-Time PCR System and results analysed with the SDS  
340 software (Applied Biosystems). The real-time PCR started with an initial enzyme activation  
341 step (5 minutes, 95°C), followed by 45 cycles consisting of a denaturing (95°C, 15 seconds)  
342 and an annealing/extending (60°C, 1min) step. For each sample triplicates were measured and  
343 glyceraldehyde-3-phosphate dehydrogenase (GAPDH) was used as endogenous control.  
344 Results were analysed by the  $\Delta\Delta$ CT method. All gene expression assays were obtained from  
345 Life Technologies.

#### 346 **Analysis of microscopy images**

347 Sections were examined using an AxioCam HRc (Zeiss) on a Zeiss Axio Imager.Z2  
348 microscope with AxioVision release 4.8.2 software. Collagen layer thickness was measured  
349 on Sirius-red stained slides in at least eight fields in representative areas at 100-fold  
350 magnification by an investigator blinded to the experiment. For the automated microscopy  
351 analysis Sirius Red-stained slides were analysed by bright-field microscopy with an additional  
352 polarizing filter. Under polarized light Sirius Red-stained collagen assumes a palette of  
353 colours ranging from green to red based on the fibrotic maturation process. The polarized  
354 light images were analysed using MATLAB software, version 8.6 R2015b (MathWorks).

355 Customized scripts identified the collagen layer of each image by clustering pixels of similar  
356 colours in two clusters using the k-means clustering algorithm.

### 357 **Western blot**

358 Tissue was lysed in M-PER cell lysis buffer (Thermo Fisher Scientific). Protein levels were  
359 determined by bicinchoninic acid (BCA) assay according to the manufacturer's instructions  
360 and equal amounts of protein were loaded onto SDS/PAGE gels. Western blots were  
361 performed using monoclonal rabbit anti-mouse TGF- $\beta$  antibodies (3711S, Bioconcept,  
362 1:1000), polyclonal rabbit anti-mouse  $\beta$ -actin antibodies (4970, 13E5, Cell Signaling,  
363 1:2000), polyclonal goat anti-mouse  $\alpha$ -SMA antibodies (PA5-18292, Thermo Fisher  
364 Scientific, undiluted) and the horseradish peroxidase-conjugated secondary goat anti-rabbit  
365 antibody (sc-2004, Santa Cruz, 1:2000). Luminescence of Western blots was quantified  
366 densitometrically with ImageJ software.

### 367 **Mass cytometry analysis**

368 Data were acquired on a CyTOF-2.1 mass cytometer (Fluidigm) with an acquisition flow rate  
369 of 0.03 ml/min. The following signal processing settings were used: default thresholding  
370 scheme, lower convolution threshold of 800 intensity units (IU), minimum event duration of 8  
371 pushes, maximum event duration of 100 pushes, noise reduction active. All samples were  
372 spiked with EQ four-element calibration beads during acquisition (Fluidigm; cat. no. 201078)  
373 and resulting FCS (Flow Cytometry Standard) files were normalized with the built-in  
374 normalization algorithm (Helios software version 6.5.358) to account for intra- and  
375 intersample intensity measurement variability. The data were analysed and visualized with  
376 Cytobank software (Cytobank Inc.) and software packages for R programming language  
377 flowCore, flowSOM and ggplot2.

378 **RNA *in situ* hybridization (RNAscope)**

379 *Ch25h* mRNA localization in the murine small intestine was assessed by RNA *in situ*  
380 hybridization. Fresh small intestine sections and intestine grafts were harvested and incubated  
381 for 24 hours in 4% paraformaldehyde/PBS (PFA/PBS). The PFA/PBS solution was replaced  
382 by 10% sucrose in PBS up to the tissue sink to the bottom of the container. This step was  
383 repeated with 20% and 30% sucrose solutions and the tissue was embedded in Optimal  
384 Cutting Temperature (OCT). Sections (3-4  $\mu\text{m}$ ) were prepared on Superfrost microscope  
385 slides (Thermo Fisher Scientific, Braunschweig, Germany). The RNA *in situ* hybridization  
386 was performed using the RNAscope 2.5 HD assay, Red (Advanced Cell Diagnostics,  
387 Hayward, CA, USA) following the manufacturer's instructions. In brief, slides were  
388 rehydrated in PBS and were subjected to pre-treatment solutions using the recommended  
389 incubation time and temperature. Next, slides were incubated for 2h with a *Ch25h* probe  
390 designed and provided by the supplier. The tissue and assay quality were tested with a  
391 positive control probe Peptidyl-prolyl cis-trans isomerase B (*Ppib*, data not shown) and a  
392 negative control probe for the bacterial gene Dihydrodipicolinate reductase (*Dapb*). Four  
393 signal amplification steps were carried out at 40°C followed by two additional steps at room  
394 temperature with the appropriate solutions. The fifth amplification step was extended from 30  
395 min to one hour in order to enhance the chromogenic signal. Detection of chromogenic  
396 signals was achieved by using the Fast-Red reagent for 10 min. Slides were counterstained  
397 with hematoxylin I and mounted with VectaMount Mounting Medium HT-5000 (Vector  
398 Laboratories, Burlingame, CA, USA).

399 ***In vitro* experiments**

400 3T3 cells were maintained in high glucose Dulbecco's Modified Eagle Medium (DMEM, Life  
401 Technologies) supplemented with 10% fetal calf serum (FCS) and kept at 37°C in a  
402 humidified atmosphere containing 5% CO<sub>2</sub>. Murine primary fibroblasts were isolated and

403 cultured as described previously[53]. The isolated cells were cultured in 25 cm<sup>2</sup> culture flasks  
404 (Costar, Bodenheim, Germany) with DMEM containing 10% FCS, penicillin (100 IE/mL),  
405 streptomycin (100 g/mL), ciprofloxacin (8 g/mL), gentamycin (50 g/mL), and amphotericin B  
406 (1 g/mL) at 37°C in a humidified atmosphere containing 10% CO<sub>2</sub>. Non-adherent cells were  
407 removed. Once fibroblasts reached 90% confluence, FCS free DMEM-medium was added  
408 and they were starved for 24 h prior to compound treatment. Cells were stimulated by  
409 treatment for 72 h with 5 ng/ml TGF-β (130-095-067, Miltenyi Biotec), 0.001-10 μM 25-HC  
410 (H1015, Sigma-Aldrich) or a combination of the two compounds as indicated.

#### 411 **Statistical analysis**

412 Data are presented as mean ±SEM unless otherwise indicated. Significance was assessed  
413 using the Mann-Whitney U test or the unpaired t test with  $p < 0.05$  considered statistically  
414 significant (\*\*\* $p < 0.001$ , \*\* $p < 0.01$ , \* $p < 0.05$ ).

#### 415 **Study approval**

416 For patient data, written informed consent was obtained for anonymous use of patient data  
417 and resected parts of human intestine according to the code of conduct for responsible use of  
418 surgical rest material (Research Code University Medical Center Groningen,  
419 <http://www.rug.nl/umcg/research/documents/research-code-info-umcg-nl.pdf>, see Code goed  
420 gebruik voor gecodeerd lichaamsmateriaal). Mouse experiments were approved by the local  
421 animal welfare authority (Tierschutzkommision Zürich, Zurich, Switzerland; registration  
422 number ZH183/2014).

423 **Acknowledgments**

424 This research was supported by a grant from the Swiss National Science Foundation to BM  
425 (Grant No. 32473B\_156525); a grant from the Hartmann-Müller Foundation to BM and an  
426 IOIBD grant to GR, MH and BM. The funding institutions had no role in study design,  
427 analysis, interpretation of the data and writing of the manuscript. The authors would like to  
428 thank Silvia Lang and Kirstin Atrott for technical assistance and Matteo Berchier for the help  
429 with the image analysis algorithm.

430 **Author Contributions**

431 TR, MH, AWS, GR and BM conceived, designed, and supervised the study. TR, MH,  
432 MNGA, BW, CM, AW and MRS performed experiments and were involved in data analysis.  
433 WTVH and GD were involved in acquisition of human data and samples. PHIS and CAW  
434 performed in situ hybridization experiments. VT performed the CyTOF analysis. SL was  
435 involved in the histological analysis. TR, MH and BM wrote the paper. MS and GR critically  
436 revised the manuscript and added important intellectual content. All authors corrected, and  
437 approved the manuscript.

438 **Disclosure**

439 The authors declare that there are no competing interests. BM has served on a Gilead advisory  
440 board and received traveling grants and grant support from MSD. GR discloses grant support  
441 from AbbVie, Ardeypharm, MSD, FALK, Flamentera, Novartis, Roche, Tillots, UCB and  
442 Zeller. MH discloses grant support from AbbVie and Novartis. CAW discloses grant support  
443 from Bayer and AstraZeneca.

444

445 **References**

- 446 1. Bernstein, C.N., E.V. Loftus, Jr., S.C. Ng, P.L. Lakatos, B. Moum, Epidemiology, and D.  
447 Natural History Task Force of the International Organization for the Study of Inflammatory  
448 Bowel, *Hospitalisations and surgery in Crohn's disease*. Gut, 2012. **61**(4): p. 622-9. DOI:  
449 10.1136/gutjnl-2011-301397
- 450 2. Bemelman, W.A. and M. Allez, *The surgical intervention: earlier or never?* Best Pract Res Clin  
451 Gastroenterol, 2014. **28**(3): p. 497-503. DOI: 10.1016/j.bpg.2014.04.013
- 452 3. Gionchetti, P., A. Dignass, S. Danese, F.J. Magro Dias, G. Rogler, P.L. Lakatos, M. Adamina,  
453 S. Ardizzone, C.J. Buskens, S. Sebastian, S. Laureti, G.M. Sampietro, B. Vucelic, C.J. van der  
454 Woude, M. Barreiro-de Acosta, C. Maaser, F. Portela, S.R. Vavricka, F. Gomollon, and Ecco,  
455 *3rd European Evidence-based Consensus on the Diagnosis and Management of Crohn's*  
456 *Disease 2016: Part 2: Surgical Management and Special Situations*. J Crohns Colitis, 2017.  
457 **11**(2): p. 135-149. DOI: 10.1093/ecco-jcc/jjw169
- 458 4. Rieder, F., C. Fiocchi, and G. Rogler, *Mechanisms, Management, and Treatment of Fibrosis in*  
459 *Patients With Inflammatory Bowel Diseases*. Gastroenterology, 2017. **152**(2): p. 340-350 e6.  
460 DOI: 10.1053/j.gastro.2016.09.047
- 461 5. Gordon, I.O., N. Agrawal, J.R. Goldblum, C. Fiocchi, and F. Rieder, *Fibrosis in ulcerative*  
462 *colitis: mechanisms, features, and consequences of a neglected problem*. Inflamm Bowel Dis,  
463 2014. **20**(11): p. 2198-206. DOI: 10.1097/MIB.0000000000000080
- 464 6. Agrawal, N.W.E., R. Lopez, B. Lashner, C. Fiocchi, I. Gordon, and F. Rieder, *Submucosal*  
465 *Fibrosis in Ulcerative Colitis Is Linked With Severity and Chronicity of Inflammation*.  
466 Gastroenterology, 2016. **150**(Supplement 1): p. S575.
- 467 7. Bettenworth, D. and F. Rieder, *Reversibility of Strictureing Crohn's Disease-Fact or Fiction?*  
468 Inflamm Bowel Dis, 2016. **22**(1): p. 241-7. DOI: 10.1097/MIB.0000000000000598
- 469 8. Rogler, G., *New therapeutic avenues for treatment of fibrosis: can we learn from other*  
470 *diseases?* Dig Dis, 2014. **32** **Suppl 1**: p. 39-49. DOI: 10.1159/000367825
- 471 9. Cosnes, J., I. Nion-Larmurier, L. Beaugerie, P. Afchain, E. Tiret, and J.P. Gendre, *Impact of*  
472 *the increasing use of immunosuppressants in Crohn's disease on the need for intestinal*  
473 *surgery*. Gut, 2005. **54**(2): p. 237-41. DOI: 10.1136/gut.2004.045294

- 474 10. Wynn, T.A. and T.R. Ramalingam, *Mechanisms of fibrosis: therapeutic translation for fibrotic*  
475 *disease*. Nat Med, 2012. **18**(7): p. 1028-40. DOI: 10.1038/nm.2807
- 476 11. Kendall, R.T. and C.A. Feghali-Bostwick, *Fibroblasts in fibrosis: novel roles and mediators*.  
477 Front Pharmacol, 2014. **5**: p. 123. DOI: 10.3389/fphar.2014.00123
- 478 12. Pohlers, D., J. Brenmoehl, I. Loffler, C.K. Muller, C. Leipner, S. Schultze-Mosgau, A.  
479 Stallmach, R.W. Kinne, and G. Wolf, *TGF-beta and fibrosis in different organs - molecular*  
480 *pathway imprints*. Biochim Biophys Acta, 2009. **1792**(8): p. 746-56. DOI:  
481 10.1016/j.bbadis.2009.06.004
- 482 13. Massague, J., *How cells read TGF-beta signals*. Nat Rev Mol Cell Biol, 2000. **1**(3): p. 169-78.  
483 DOI: 10.1038/35043051
- 484 14. Duffield, J.S., M. Grafals, and D. Portilla, *MicroRNAs are potential therapeutic targets in*  
485 *fibrosing kidney disease: lessons from animal models*. Drug Discov Today Dis Models, 2013.  
486 **10**(3): p. e127-e135. DOI: 10.1016/j.ddmod.2012.08.004
- 487 15. Hinz, B., *The myofibroblast: paradigm for a mechanically active cell*. J Biomech, 2010. **43**(1):  
488 p. 146-55. DOI: 10.1016/j.jbiomech.2009.09.020
- 489 16. Kramann, R., D.P. DiRocco, and B.D. Humphreys, *Understanding the origin, activation and*  
490 *regulation of matrix-producing myofibroblasts for treatment of fibrotic disease*. J Pathol, 2013.  
491 **231**(3): p. 273-89. DOI: 10.1002/path.4253
- 492 17. Koga, H., H. Yang, J. Adler, E.M. Zimmermann, and D.H. Teitelbaum, *Transanal delivery of*  
493 *angiotensin converting enzyme inhibitor prevents colonic fibrosis in a mouse colitis model:*  
494 *development of a unique mode of treatment*. Surgery, 2008. **144**(2): p. 259-68. DOI:  
495 10.1016/j.surg.2008.03.043
- 496 18. Speca, S., C. Rousseaux, C. Dubuquoy, F. Rieder, A. Vetusch, R. Sferra, I. Giusti, B. Bertin,  
497 L. Dubuquoy, E. Gaudio, P. Desreumaux, and G. Latella, *Novel PPARgamma Modulator*  
498 *GED-0507-34 Levo Ameliorates Inflammation-driven Intestinal Fibrosis*. Inflamm Bowel Dis,  
499 2016. **22**(2): p. 279-92. DOI: 10.1097/MIB.0000000000000618
- 500 19. Hausmann, M., T. Rechsteiner, M. Caj, C. Benden, M. Fried, A. Boehler, and G. Rogler, *A*  
501 *new heterotopic transplant animal model of intestinal fibrosis*. Inflamm Bowel Dis, 2013.  
502 **19**(11): p. 2302-14. DOI: 10.1097/MIB.0b013e3182a6a0f3

- 503 20. Meier, R., C. Lutz, J. Cosin-Roger, S. Fagagnini, G. Bollmann, A. Hunerwadel, C. Mamie, S.  
504 Lang, A. Tchouboukov, F.E. Weber, A. Weber, G. Rogler, and M. Hausmann, *Decreased*  
505 *Fibrogenesis After Treatment with Pirfenidone in a Newly Developed Mouse Model of*  
506 *Intestinal Fibrosis*. *Inflamm Bowel Dis*, 2016. **22**(3): p. 569-82. DOI:  
507 10.1097/MIB.0000000000000716
- 508 21. Gold, E.S., A.H. Diercks, I. Podolsky, R.L. Podyminogin, P.S. Askovich, P.M. Treuting, and A.  
509 Aderem, *25-Hydroxycholesterol acts as an amplifier of inflammatory signaling*. *Proc Natl Acad*  
510 *Sci U S A*, 2014. **111**(29): p. 10666-71. DOI: 10.1073/pnas.1404271111
- 511 22. Gold, E.S., S.A. Ramsey, M.J. Sartain, J. Selinummi, I. Podolsky, D.J. Rodriguez, R.L. Moritz,  
512 and A. Aderem, *ATF3 protects against atherosclerosis by suppressing 25-hydroxycholesterol-*  
513 *induced lipid body formation*, in *J Exp Med*. 2012. p. 807-17.
- 514 23. Shibata, N., A.F. Carlin, N.J. Spann, K. Saijo, C.S. Morello, J.G. McDonald, C.E. Romanoski,  
515 M.R. Maurya, M.U. Kaikkonen, M.T. Lam, A. Crotti, D. Reichart, J.N. Fox, O. Quehenberger,  
516 C.R. Raetz, M.C. Sullards, R.C. Murphy, A.H. Merrill, Jr., H.A. Brown, E.A. Dennis, E. Fahy, S.  
517 Subramaniam, D.R. Cavener, D.H. Spector, D.W. Russell, and C.K. Glass, *25-*  
518 *Hydroxycholesterol activates the integrated stress response to reprogram transcription and*  
519 *translation in macrophages*. *J Biol Chem*, 2013. **288**(50): p. 35812-23. DOI:  
520 10.1074/jbc.M113.519637
- 521 24. Soroosh, P., J. Wu, X. Xue, J. Song, S.W. Sutton, M. Sablad, J. Yu, M.I. Nelen, X. Liu, G.  
522 Castro, R. Luna, S. Crawford, H. Banie, R.A. Dandridge, X. Deng, A. Bittner, C. Kuei, M.  
523 Tootoonchi, N. Rozenkrants, K. Herman, J. Gao, X.V. Yang, K. Sachen, K. Ngo, W.P. Fung-  
524 Leung, S. Nguyen, A. de Leon-Tabaldo, J. Blevitt, Y. Zhang, M.D. Cummings, T. Rao, N.S.  
525 Mani, C. Liu, M. McKinnon, M.E. Milla, A.M. Fourie, and S. Sun, *Oxysterols are agonist*  
526 *ligands of RORgammat and drive Th17 cell differentiation*. *Proc Natl Acad Sci U S A*, 2014.  
527 **111**(33): p. 12163-8. DOI: 10.1073/pnas.1322807111
- 528 25. Wang, F., W. Xia, F. Liu, J. Li, G. Wang, and J. Gu, *Interferon regulator factor 1/retinoic*  
529 *inducible gene 1 (IRF1/RIG-I) axis mediates 25-hydroxycholesterol-induced interleukin-8*  
530 *production in atherosclerosis*. *Cardiovasc Res*, 2012. **93**(1): p. 190-9. DOI: 10.1093/cvr/cvr260
- 531 26. Lemaire-Ewing, S., A. Berthier, M.C. Royer, E. Logette, L. Corcos, A. Bouchot, S. Monier, C.  
532 Prunet, M. Raveneau, C. Rebe, C. Desrumaux, G. Lizard, and D. Neel, *7beta-*



- 533 *Hydroxycholesterol and 25-hydroxycholesterol-induced interleukin-8 secretion involves a*  
534 *calcium-dependent activation of c-fos via the ERK1/2 signaling pathway in THP-1 cells:*  
535 *oxysterols-induced IL-8 secretion is calcium-dependent. Cell Biol Toxicol, 2009. 25(2): p. 127-*  
536 *39. DOI: 10.1007/s10565-008-9063-0*
- 537 27. Dugas, B., S. Charbonnier, M. Baarine, K. Ragot, D. Delmas, F. Menetrier, J. Lherminier, L.  
538 Malvitte, T. Khalfaoui, A. Bron, C. Creuzot-Garcher, N. Latruffe, and G. Lizard, *Effects of*  
539 *oxysterols on cell viability, inflammatory cytokines, VEGF, and reactive oxygen species*  
540 *production on human retinal cells: cytoprotective effects and prevention of VEGF secretion by*  
541 *resveratrol. Eur J Nutr, 2010. 49(7): p. 435-46. DOI: 10.1007/s00394-010-0102-2*
- 542 28. Blanc, M., W.Y. Hsieh, K.A. Robertson, K.A. Kropp, T. Forster, G. Shui, P. Lacaze, S.  
543 Watterson, S.J. Griffiths, N.J. Spann, A. Meljon, S. Talbot, K. Krishnan, D.F. Covey, M.R.  
544 Wenk, M. Craigon, Z. Ruzsics, J. Haas, A. Angulo, W.J. Griffiths, C.K. Glass, Y. Wang, and P.  
545 Ghazal, *The transcription factor STAT-1 couples macrophage synthesis of 25-*  
546 *hydroxycholesterol to the interferon antiviral response. Immunity, 2013. 38(1): p. 106-18. DOI:*  
547 *10.1016/j.immuni.2012.11.004*
- 548 29. Liu, S.Y., R. Aliyari, K. Chikere, G. Li, M.D. Marsden, J.K. Smith, O. Pernet, H. Guo, R.  
549 Nusbaum, J.A. Zack, A.N. Freiberg, L. Su, B. Lee, and G. Cheng, *Interferon-inducible*  
550 *cholesterol-25-hydroxylase broadly inhibits viral entry by production of 25-hydroxycholesterol.*  
551 *Immunity, 2013. 38(1): p. 92-105. DOI: 10.1016/j.immuni.2012.11.005*
- 552 30. Xiang, Y., J.J. Tang, W. Tao, X. Cao, B.L. Song, and J. Zhong, *Identification of Cholesterol*  
553 *25-Hydroxylase as a Novel Host Restriction Factor and a Part of the Primary Innate Immune*  
554 *Responses against Hepatitis C Virus Infection. J Virol, 2015. 89(13): p. 6805-16. DOI:*  
555 *10.1128/JVI.00587-15*
- 556 31. Dang, E.V., J.G. McDonald, D.W. Russell, and J.G. Cyster, *Oxysterol Restraint of Cholesterol*  
557 *Synthesis Prevents AIM2 Inflammasome Activation. Cell, 2017. 171(5): p. 1057-1071 e11.*  
558 *DOI: 10.1016/j.cell.2017.09.029*
- 559 32. Lund, E.G., T.A. Kerr, J. Sakai, W.P. Li, and D.W. Russell, *cDNA cloning of mouse and*  
560 *human cholesterol 25-hydroxylases, polytopic membrane proteins that synthesize a potent*  
561 *oxysterol regulator of lipid metabolism. J Biol Chem, 1998. 273(51): p. 34316-27.*

- 562 33. Bauman, D.R., A.D. Bitmansour, J.G. McDonald, B.M. Thompson, G. Liang, and D.W.  
563 Russell, *25-Hydroxycholesterol secreted by macrophages in response to Toll-like receptor*  
564 *activation suppresses immunoglobulin A production*. Proc Natl Acad Sci U S A, 2009. **106**(39):  
565 p. 16764-9. DOI: 10.1073/pnas.0909142106
- 566 34. Diczfalusy, U., K.E. Olofsson, A.M. Carlsson, M. Gong, D.T. Golenbock, O. Rooyackers, U.  
567 Flaring, and H. Bjorkbacka, *Marked upregulation of cholesterol 25-hydroxylase expression by*  
568 *lipopolysaccharide*. J Lipid Res, 2009. **50**(11): p. 2258-64. DOI: 10.1194/jlr.M900107-JLR200
- 569 35. Sugiura, H., A. Koarai, T. Ichikawa, Y. Minakata, K. Matsunaga, T. Hirano, K. Akamatsu, S.  
570 Yanagisawa, M. Furusawa, Y. Uno, M. Yamasaki, Y. Satomi, and M. Ichinose, *Increased 25-*  
571 *hydroxycholesterol concentrations in the lungs of patients with chronic obstructive pulmonary*  
572 *disease*. Respirology, 2012. **17**(3): p. 533-40. DOI: 10.1111/j.1440-1843.2012.02136.x
- 573 36. Hannedouche, S., J. Zhang, T. Yi, W. Shen, D. Nguyen, J.P. Pereira, D. Guerini, B.U.  
574 Baumgarten, S. Roggo, B. Wen, R. Knochenmuss, S. Noel, F. Gessier, L.M. Kelly, M. Vanek,  
575 S. Laurent, I. Preuss, C. Miault, I. Christen, R. Karuna, W. Li, D.I. Koo, T. Suply, C. Schmedt,  
576 E.C. Peters, R. Falchetto, A. Katopodis, C. Spanka, M.O. Roy, M. Detheux, Y.A. Chen, P.G.  
577 Schultz, C.Y. Cho, K. Seuwen, J.G. Cyster, and A.W. Sailer, *Oxysterols direct immune cell*  
578 *migration via EBI2*. Nature, 2011. **475**(7357): p. 524-7. DOI: 10.1038/nature10280
- 579 37. Liu, C., X.V. Yang, J. Wu, C. Kuei, N.S. Mani, L. Zhang, J. Yu, S.W. Sutton, N. Qin, H. Banie,  
580 L. Karlsson, S. Sun, and T.W. Lovenberg, *Oxysterols direct B-cell migration through EBI2*.  
581 Nature, 2011. **475**(7357): p. 519-23. DOI: 10.1038/nature10226
- 582 38. Esnault, S., K. Bernau, E.E. Torr, Y.A. Bochkov, N.N. Jarjour, and N. Sandbo, *RNA-*  
583 *sequencing analysis of lung primary fibroblast response to eosinophil-degranulation products*  
584 *predicts downstream effects on inflammation, tissue remodeling and lipid metabolism*. Respir  
585 Res, 2017. **18**(1): p. 188. DOI: 10.1186/s12931-017-0669-8
- 586 39. Ichikawa, T., H. Sugiura, A. Koarai, T. Kikuchi, M. Hiramatsu, H. Kawabata, K. Akamatsu, T.  
587 Hirano, M. Nakanishi, K. Matsunaga, Y. Minakata, and M. Ichinose, *25-hydroxycholesterol*  
588 *promotes fibroblast-mediated tissue remodeling through NF-kappaB dependent pathway*. Exp  
589 Cell Res, 2013. **319**(8): p. 1176-86. DOI: 10.1016/j.yexcr.2013.02.014

- 590 40. Lawrance, I.C., G. Rogler, G. Bamias, C. Breynaert, J. Florholmen, G. Pellino, S. Reif, S.  
591 Specca, and G. Latella, *Cellular and Molecular Mediators of Intestinal Fibrosis*. J Crohns  
592 Colitis, 2015. DOI: 10.1016/j.crohns.2014.09.008
- 593 41. Rieder, F. and C. Fiocchi, *Intestinal fibrosis in IBD--a dynamic, multifactorial process*. Nat Rev  
594 Gastroenterol Hepatol, 2009. **6**(4): p. 228-35. DOI: 10.1038/nrgastro.2009.31
- 595 42. Xu, L., Q. Bai, D. Rodriguez-Agudo, P.B. Hylemon, D.M. Heuman, W.M. Pandak, and S. Ren,  
596 *Regulation of hepatocyte lipid metabolism and inflammatory response by 25-*  
597 *hydroxycholesterol and 25-hydroxycholesterol-3-sulfate*. Lipids, 2010. **45**(9): p. 821-32. DOI:  
598 10.1007/s11745-010-3451-y
- 599 43. Palozza, P., R. Simone, A. Catalano, G. Monego, A. Barini, M.C. Mele, N. Parrone, S.  
600 Trombino, N. Picci, and F.O. Ranelletti, *Lycopene prevention of oxysterol-induced*  
601 *proinflammatory cytokine cascade in human macrophages: inhibition of NF-kappaB nuclear*  
602 *binding and increase in PPARgamma expression*. J Nutr Biochem, 2011. **22**(3): p. 259-68.  
603 DOI: 10.1016/j.jnutbio.2010.02.003
- 604 44. Reboldi, A., E.V. Dang, J.G. McDonald, G. Liang, D.W. Russell, and J.G. Cyster,  
605 *Inflammation. 25-Hydroxycholesterol suppresses interleukin-1-driven inflammation*  
606 *downstream of type I interferon*. Science, 2014. **345**(6197): p. 679-84. DOI:  
607 10.1126/science.1254790
- 608 45. Reboldi, A. and J.G. Cyster, *Peyer's patches: organizing B-cell responses at the intestinal*  
609 *frontier*. Immunol Rev, 2016. **271**(1): p. 230-45. DOI: 10.1111/imr.12400
- 610 46. Wilson, M.S., S.K. Madala, T.R. Ramalingam, B.R. Gochuico, I.O. Rosas, A.W. Cheever, and  
611 T.A. Wynn, *Bleomycin and IL-1beta-mediated pulmonary fibrosis is IL-17A dependent*. J Exp  
612 Med, 2010. **207**(3): p. 535-52. DOI: 10.1084/jem.20092121
- 613 47. Tan, Z., X. Qian, R. Jiang, Q. Liu, Y. Wang, C. Chen, X. Wang, B. Ryffel, and B. Sun, *IL-17A*  
614 *plays a critical role in the pathogenesis of liver fibrosis through hepatic stellate cell activation*.  
615 J Immunol, 2013. **191**(4): p. 1835-44. DOI: 10.4049/jimmunol.1203013
- 616 48. Biancheri, P., S.L. Pender, F. Ammoscato, P. Giuffrida, G. Sampietro, S. Ardizzone, A.  
617 Ghanbari, R. Curciarello, A. Pasini, G. Monteleone, G.R. Corazza, T.T. Macdonald, and A. Di  
618 Sabatino, *The role of interleukin 17 in Crohn's disease-associated intestinal fibrosis*.  
619 Fibrogenesis Tissue Repair, 2013. **6**(1): p. 13. DOI: 10.1186/1755-1536-6-13

- 620 49. Pezacki, J.P., S.M. Sagan, A.M. Tonary, Y. Rouleau, S. Belanger, L. Supekova, and A.I. Su,  
621 *Transcriptional profiling of the effects of 25-hydroxycholesterol on human hepatocyte*  
622 *metabolism and the antiviral state it conveys against the hepatitis C virus.* BMC Chem Biol,  
623 2009. **9**: p. 2. DOI: 10.1186/1472-6769-9-2
- 624 50. Park, K. and A.L. Scott, *Cholesterol 25-hydroxylase production by dendritic cells and*  
625 *macrophages is regulated by type I interferons.* J Leukoc Biol, 2010. **88**(6): p. 1081-7. DOI:  
626 10.1189/jlb.0610318
- 627 51. Becker, C., M.C. Fantini, and M.F. Neurath, *High resolution colonoscopy in live mice.* Nat  
628 Protoc, 2006. **1**(6): p. 2900-4. DOI: 10.1038/nprot.2006.446
- 629 52. Obermeier, F., G. Kojouharoff, W. Hans, J. Scholmerich, V. Gross, and W. Falk, *Interferon-*  
630 *gamma (IFN-gamma)- and tumour necrosis factor (TNF)-induced nitric oxide as toxic effector*  
631 *molecule in chronic dextran sulphate sodium (DSS)-induced colitis in mice.* Clin Exp Immunol,  
632 1999. **116**(2): p. 238-45.
- 633 53. Leeb, S.N., D. Vogl, W. Falk, J. Scholmerich, G. Rogler, and C.M. Gelbmann, *Regulation of*  
634 *migration of human colonic myofibroblasts.* Growth Factors, 2002. **20**(2): p. 81-91.
- 635
- 636

637 **Figures Legend**

638 **Figure 1: Upregulation of *CH25H* mRNA expression in human fibrotic tissue of patients**  
639 **with CD.**

640 **(A)** Representative images of Sirius-red stained human ileum samples from healthy controls  
641 (left panel) and CD patients in a non-fibrotic (middle panel) and in a fibrotic region (right  
642 panel). Scale bar: 2.5 mm. **(B)** Samples were analysed for *CH25H* mRNA expression and  
643 normalized to *GAPDH*. *CH25H* mRNA level was correlated with mRNA levels of **(C)** *COL1*,  
644 **(D)** *COL3* **(E)** *SMA* and **(F)** *TGFB*. White: CD fibrotic, (n=6), grey: CD non fibrotic (n=7),  
645 black: healthy control (n=4). Statistical analysis: B: Mann-Whitney U test; \* = p < 0.05. CD,  
646 Crohn's disease. C-E: Correlation analysis: Spearman R (non-parametric correlation).

647

648 **Figure 2: Reduced fibrosis in *Ch25h*<sup>-/-</sup> mice in chronic DSS colitis.**

649 *Ch25h*<sup>-/-</sup> and WT female mice were treated for four cycles with 2.5% DSS or water (controls).  
650 **(A)** Representative transmission light images of Sirius-red stained intestinal sections of WT  
651 and *Ch25h*<sup>-/-</sup> DSS treated mice and water littermate controls. Scale bar: 50 μm. **(B)** Collagen  
652 layer thickness calculated from ≥8 positions per graft in representative areas of Sirius-red  
653 stained slides with transmission light at 200-fold magnification. **(C)** Quantification of  
654 collagen layer area in DSS treated animals using customized Matlab scripts. The colon was  
655 analysed for mRNA expression of **(D)** *Tgf-beta*, **(E)** *Col3*, **(F)** *Coll1*, **(G)** *Loxl2*, **(H)** *Timp1*  
656 and **(I)** *Ch25h* (normalized to *Gapdh*). Expression levels are normalized to water-treated  
657 wildtype controls. Statistical analysis: Mann-Whitney U test; \* = p<0.05. n = 4-6 per group.

658

659

660

661 **Figure 3: Reduced levels of intestinal fibrosis in CH25H deficient mice is not due to**  
662 **reduced inflammation in chronic DSS colitis.**

663 Analysis of colon inflammation in H/E stained colon sections. **(A)** Score of the inflammatory  
664 infiltrate (left panel), score for epithelial damage (middle panel) and total histology score  
665 (sum of both partial scores, right panel). **(B)** Murine endoscopic index of colitis severity  
666 (MEICS) score (left panel) and spleen weight (right panel). **(C)** Representative H/E-stained  
667 sections of the distal colon of water control mice (left panel) and DSS treated mice. DSS,  
668 dextran sodium sulphate; H/E: hematoxylin and eosin.

669

670 **Figure 4: Reduced levels of intestinal fibrosis in CH25H deficient mice in the heterotopic**  
671 **transplantation model.**

672 Wildtype and *Ch25h*<sup>-/-</sup> animals were tested in a heterotopic transplantation model for  
673 intestinal fibrosis. **(A)** Left panels: Overview (low resolution image) of Sirius red-stained  
674 intestinal grafts of WT and *Ch25h*<sup>-/-</sup> mice at day 7 after transplantation. Scale bar: 1 mm.  
675 Middle panels: Representative transmission light images demonstrating increased collagen  
676 layer thickness in grafts at day 7 compared to freshly isolated intestines at day 0. Upper  
677 panels: WT littermate controls. Lower panels: *Ch25h*<sup>-/-</sup>. Scale bar: 50  $\mu$ m. Right panels: High  
678 resolution inserts illustrating measurements of collagen layer thickness. **(B)** Collagen layer  
679 thickness calculated from  $\geq 8$  positions per graft in representative areas of Sirius-red stained  
680 slides with transmission light at 200-fold magnification. **(C)** Image analysis for identification  
681 of collagen layer areas using Matlab custom made scripts. Left panel: Original polarized 200x  
682 light microscopy image. Middle panel: Collagen layer area. Right panel: Remaining non-  
683 collagen tissue. Scale bar: 50  $\mu$ m. **(D)** Quantification of collagen layer area at day 7 post  
684 transplantation using the same strategy as in (C). **(E)** Collagen quantification with  
685 hydroxyproline assay. Day 0, freshly isolated intestine. Day 7, intestine 7 days post

686 transplantation.  $n_{WT}$  day 0 = 3,  $n_{KO}$  day 0 = 9,  $n_{WT}$  day 7 = 8,  $n_{WT}$  day 7 = 11. Statistical  
687 analysis: Mann-Whitney U test; \*:  $p < 0.05$ , \*\*:  $p < 0.01$ . Bars indicate mean  $\pm$  SEM. WT,  
688 wildtype. CH25H, cholesterol 25 hydroxylase. HYP, hydroxyproline.

689

690 **Figure 5: Expression of intestinal fibrosis markers in wildtype and *Ch25h*<sup>-/-</sup> mice.**

691 Wildtype and *Ch25h*<sup>-/-</sup> mice were tested in a heterotopic intestinal transplant model. Freshly  
692 isolated intestines (day 0) and grafts 7 days after transplantation were analysed for mRNA  
693 expression of (A) *Ch25h*, (B) *Coll*, (C) *Mmp9* and (D) *Timp1* (normalized to *Gapdh*). (E, F)  
694 Analysis of protein expression of TGF- $\beta$  by Western blot. Expression levels are normalized  
695 relative to freshly isolated intestine at day 0 and shown as mean  $\pm$  SEM. Statistical analysis:  
696 A-D: Mann-Whitney U test; \* =  $p < 0.05$ , \*\* =  $p < 0.01$ .  $n_{WT}$  day 0 = 3,  $n_{KO}$  day 0 = 9,  $n_{WT}$  day  
697 7 = 8,  $n_{WT}$  day 7 = 11. E-F: n = 4, Unpaired t test.

698

699 **Figure 6: Cells infiltrating the graft do not differ between wildtype and CH25H-deficient**  
700 **mice.**

701 Lamina propria infiltrating cells from grafts of wildtype and *Ch25h*<sup>-/-</sup> mice were harvested 7  
702 days after surgery and analysed by CyTOF. (A) Dimensionality-reduced projection of the  
703 entire phenotypical landscape was calculated using the tSNE algorithm with Barnes-Hut  
704 approximation (bhSNE). The color-coding represents staining intensity of the specified  
705 marker. (B) t-SNE maps of each experimental group; 250'000 randomly selected points are  
706 plotted. Overlaid in color are cluster designations computed by the Phenograph clustering  
707 algorithm. The represented clusters were manually constructed by merging the initial cluster  
708 output based on phenotypical similarity until the final number of 11 identifiable clusters was  
709 reached. (C) Bar plot showing the mean cluster frequencies and error bars representing  
710 standard error of the mean (SEM).  $n_{WT}$  = 5,  $n_{KO}$  = 5

711 **Figure 7: Expression of Ch25h in fibroblasts in intestinal grafts**

712 **(A)** Representative images of the *in situ* hybridization (RNAscope) analysis of wildtype small  
713 intestine. Negative control (a probe for the bacterial gene dihydrodipicolinate reductase,  
714 *Dapb*, left panel) and *Ch25h* mRNA (middle panel) are demonstrated with the RNAscope  
715 signal shown in red. Right panel: High resolution of inserts of the RNAscope signal. Scale  
716 bar: 25  $\mu$ m. **(B)** Representative images of the *Ch25h* RNAscope analysis of the intestinal  
717 grafts of WT mice at day 7 after transplantation, demonstrating accumulation of the CH25H  
718 signal in fibroblasts in the former mucosa layer. Scale bar left panel: 20  $\mu$ m, middle panel: 50  
719  $\mu$ m. The right panel shows inserts of the middle panel. Fibroblasts are indicated by arrows,  
720 neutrophils by a double arrow. **(C)** 3T3 cells (left panel) and primary mouse intestinal  
721 fibroblasts (right panel) were treated for 72 h with different concentrations of 25-HC and/or  
722 TGF- $\beta$  as indicated. Samples were analysed for  $\alpha$ -SMA protein levels by Western blot.  
723 Expression levels are normalized relative to the negative control and shown as mean  $\pm$  SEM.  
724 Statistical analysis: Unpaired t test, the \* is relative to the negative control; \* =  $p < 0.05$ , \*\*:   
725  $p < 0.01$ ,  $n = 2$ .

726

727 **Supplementary Figure 1: Intestinal grafts from wildtype and CH25H deficient mice do**  
728 **not differ regarding IL-17 expression.**

729 **(A)** IL-17 positive areas in intestinal grafts from wildtype and *Ch25h*<sup>-/-</sup> animals identified by  
730 automated image analysis using Matlab custom made scripts. The percentage of IL-17  
731 positive staining relative to the graft area is indicated. No significant differences were  
732 detected.  $n_{WT} = 3$ ,  $n_{KO} = 2$ , Unpaired t test. **(B)** Representative IL-17 stained pictures; left  
733 panel: WT, right panel: *Ch25h*<sup>-/-</sup>. Scale bar: 50  $\mu$ m.

734

735



736 **Supplementary Figure 2: Specificity of *Ch25h* RNAscope staining**

737 **(A)** Freshly isolated intestine of a *Ch25h*<sup>-/-</sup> mouse, demonstrating absence of *Ch25h* mRNA  
738 staining.

739

740

741 **Table captions**

742 **Table 1: Characteristics of patients with CD and controls.** NA: Non-applicable

743

744 **Table 2: Antibodies used for CyTOF analysis.** All antibodies were pre-labelled (Fluidigm).

745

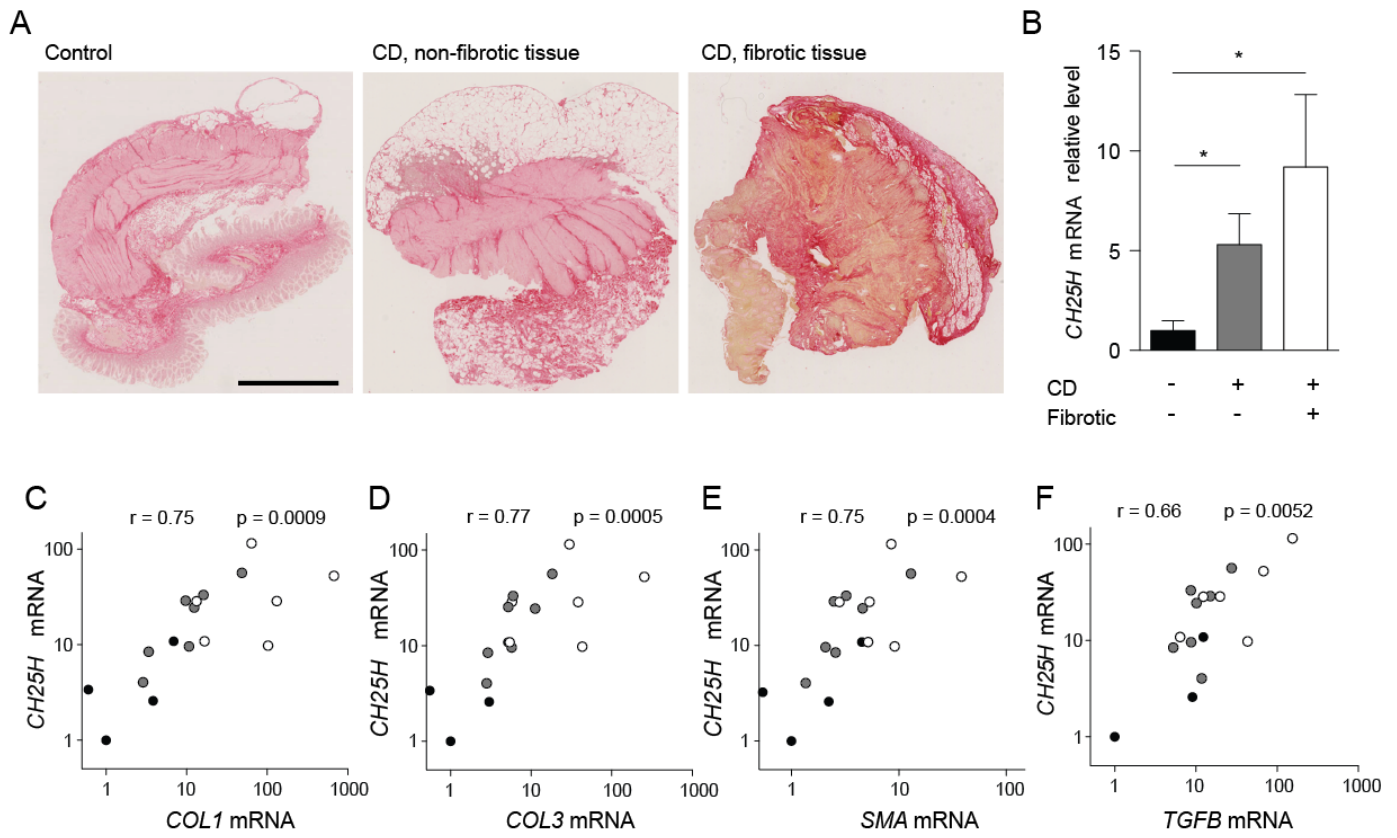

**Figure 1**

**A**

WT, water

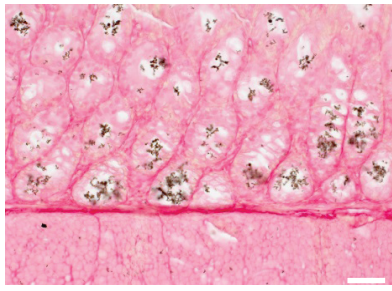

*Ch25h<sup>-/-</sup>*, water

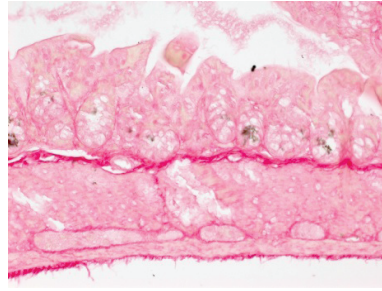

WT, DSS

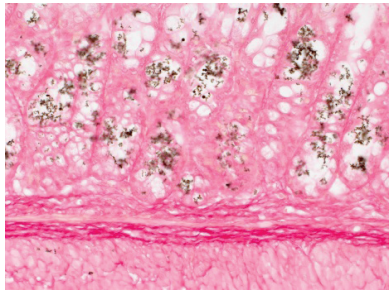

*Ch25h<sup>-/-</sup>*, DSS

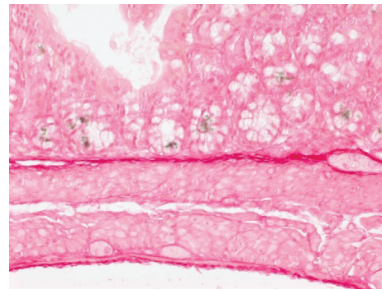

**B**

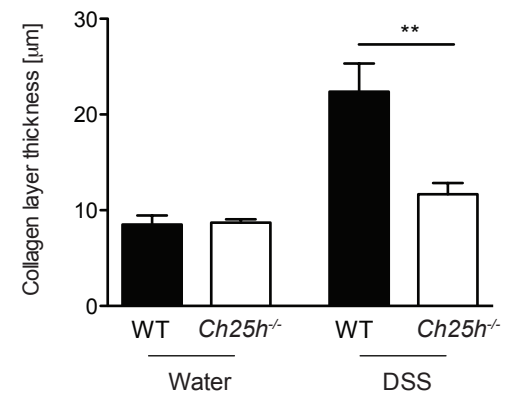

**C**

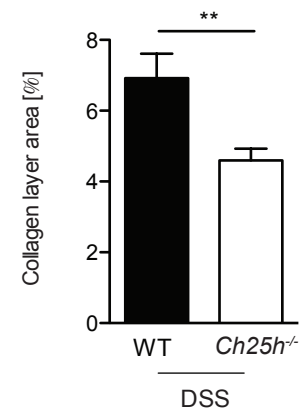

**D**

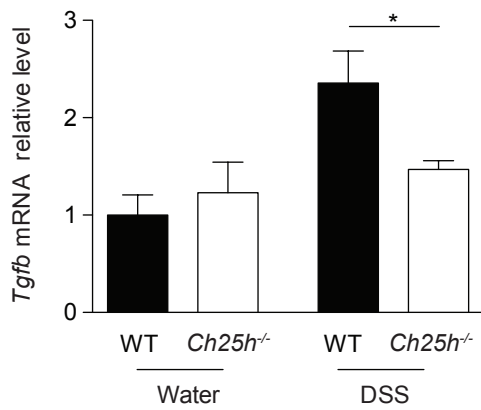

**E**

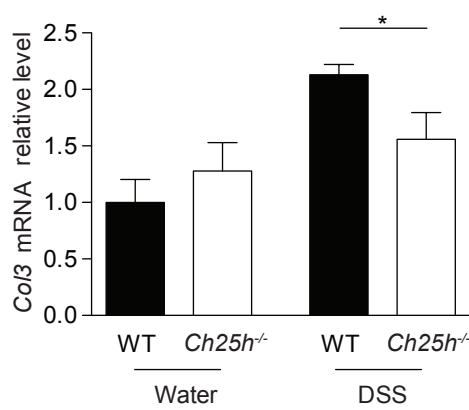

**F**

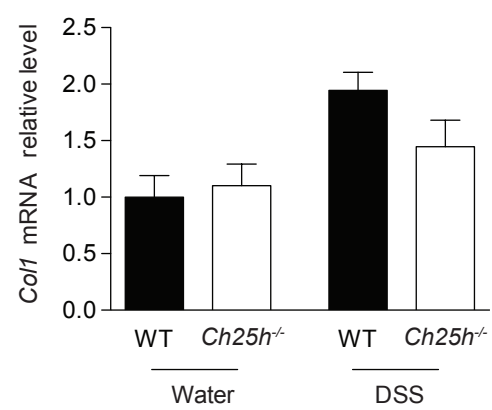

**G**

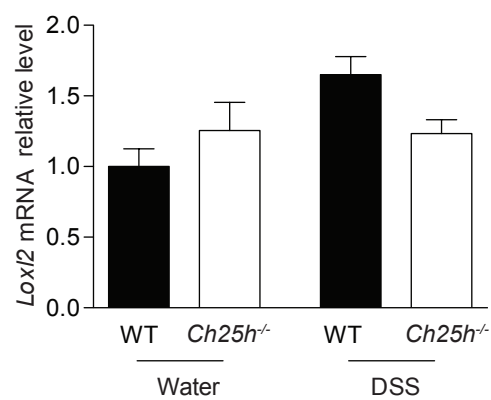

**H**

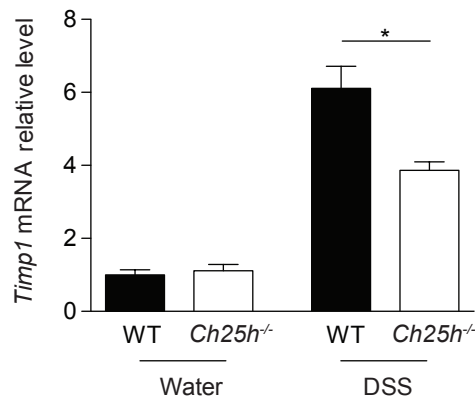

**I**

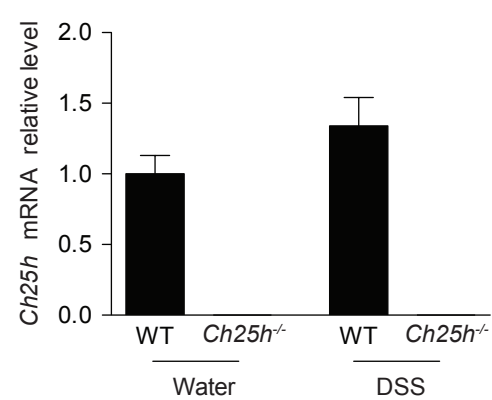

**Figure 2**

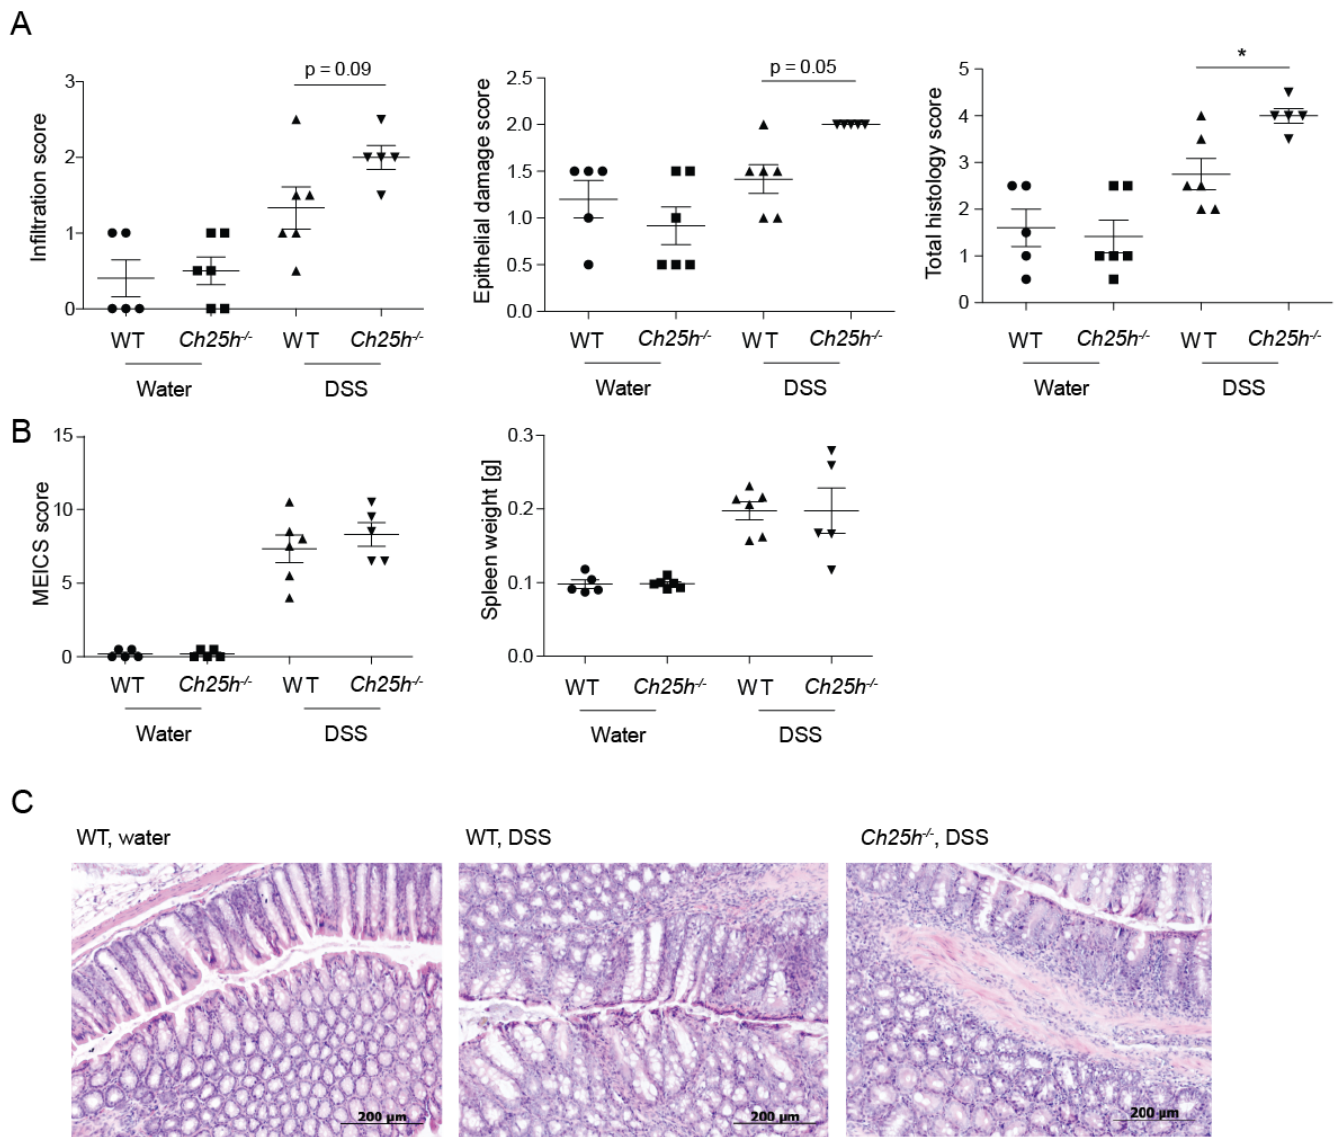

**Figure 3**

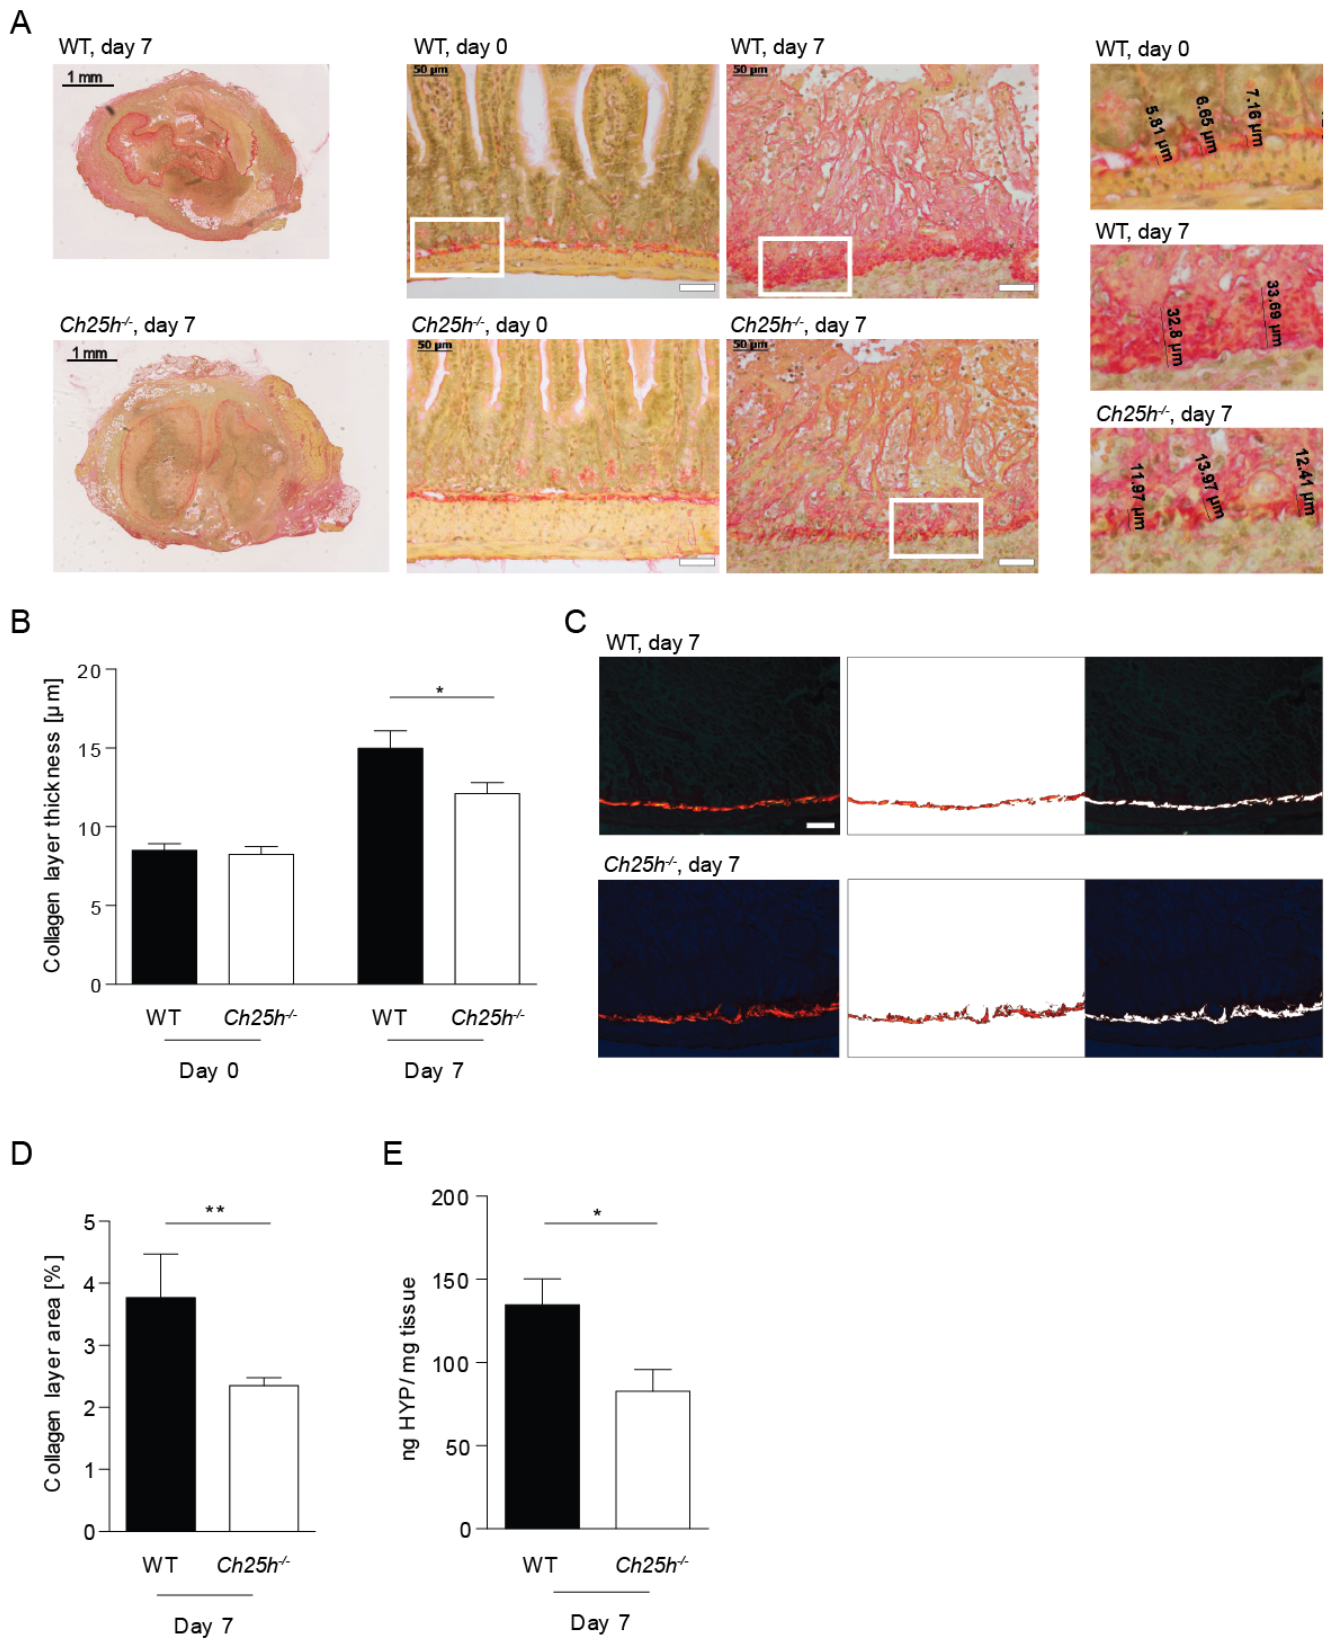

Figure 4

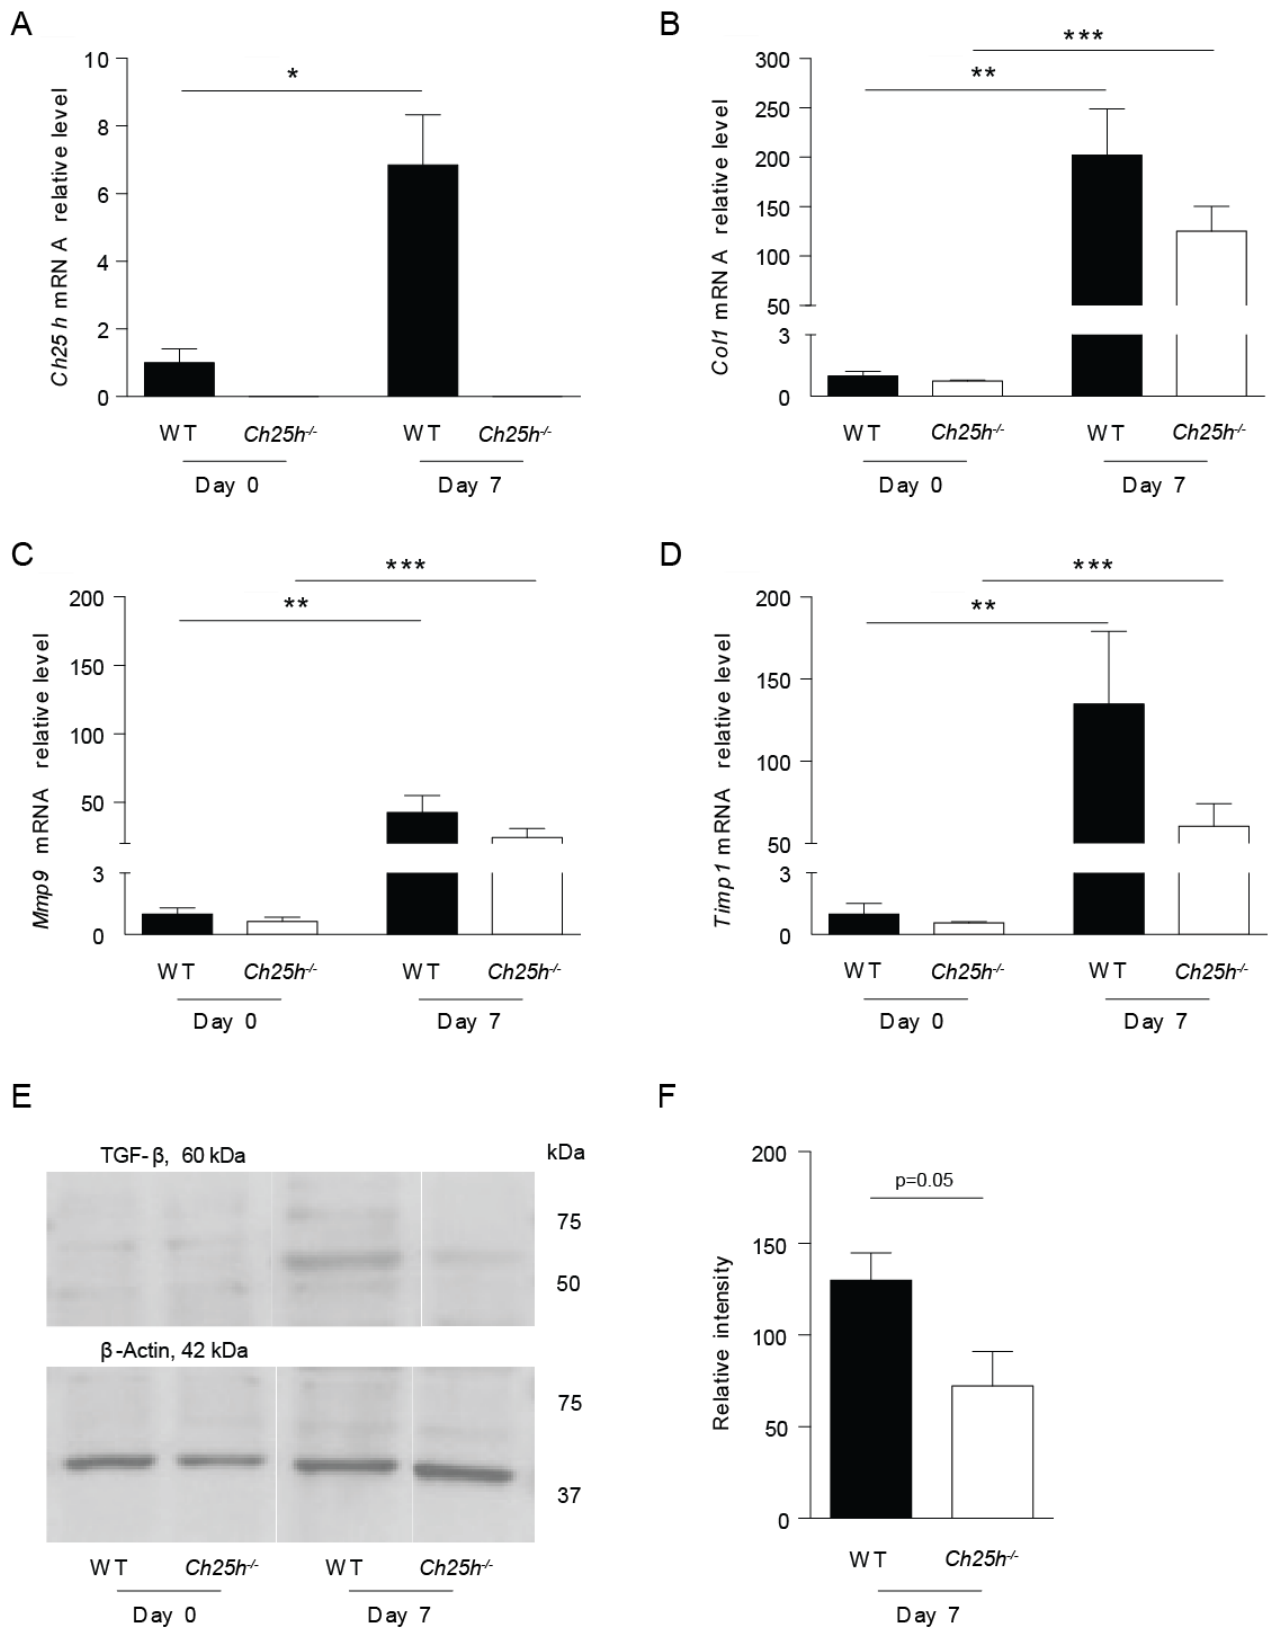

**Figure 5**

A

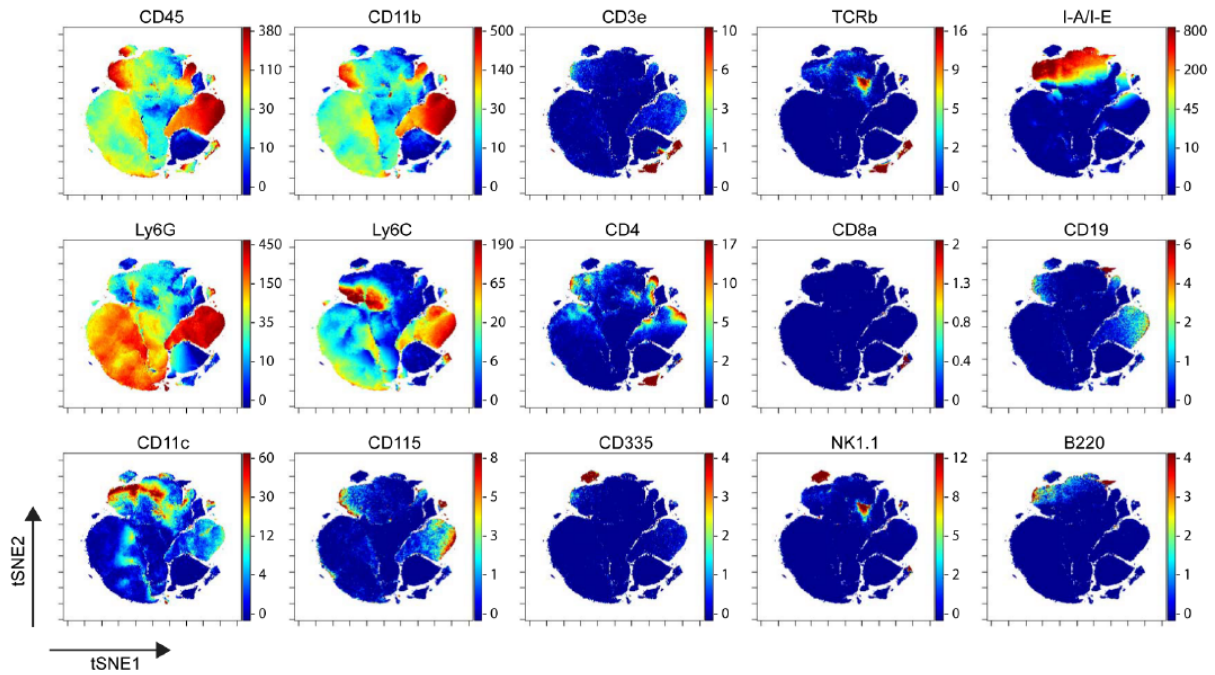

B

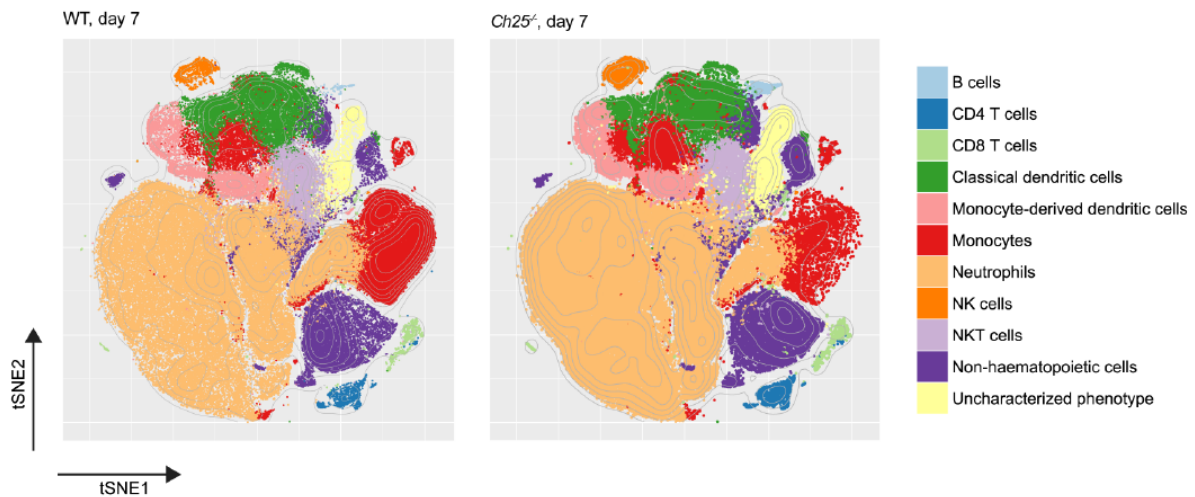

C

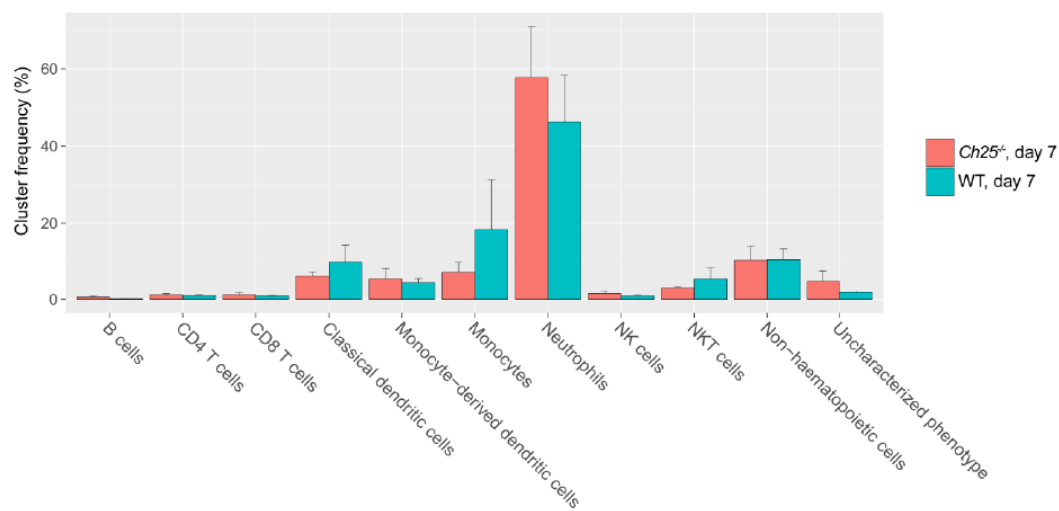

Figure 6



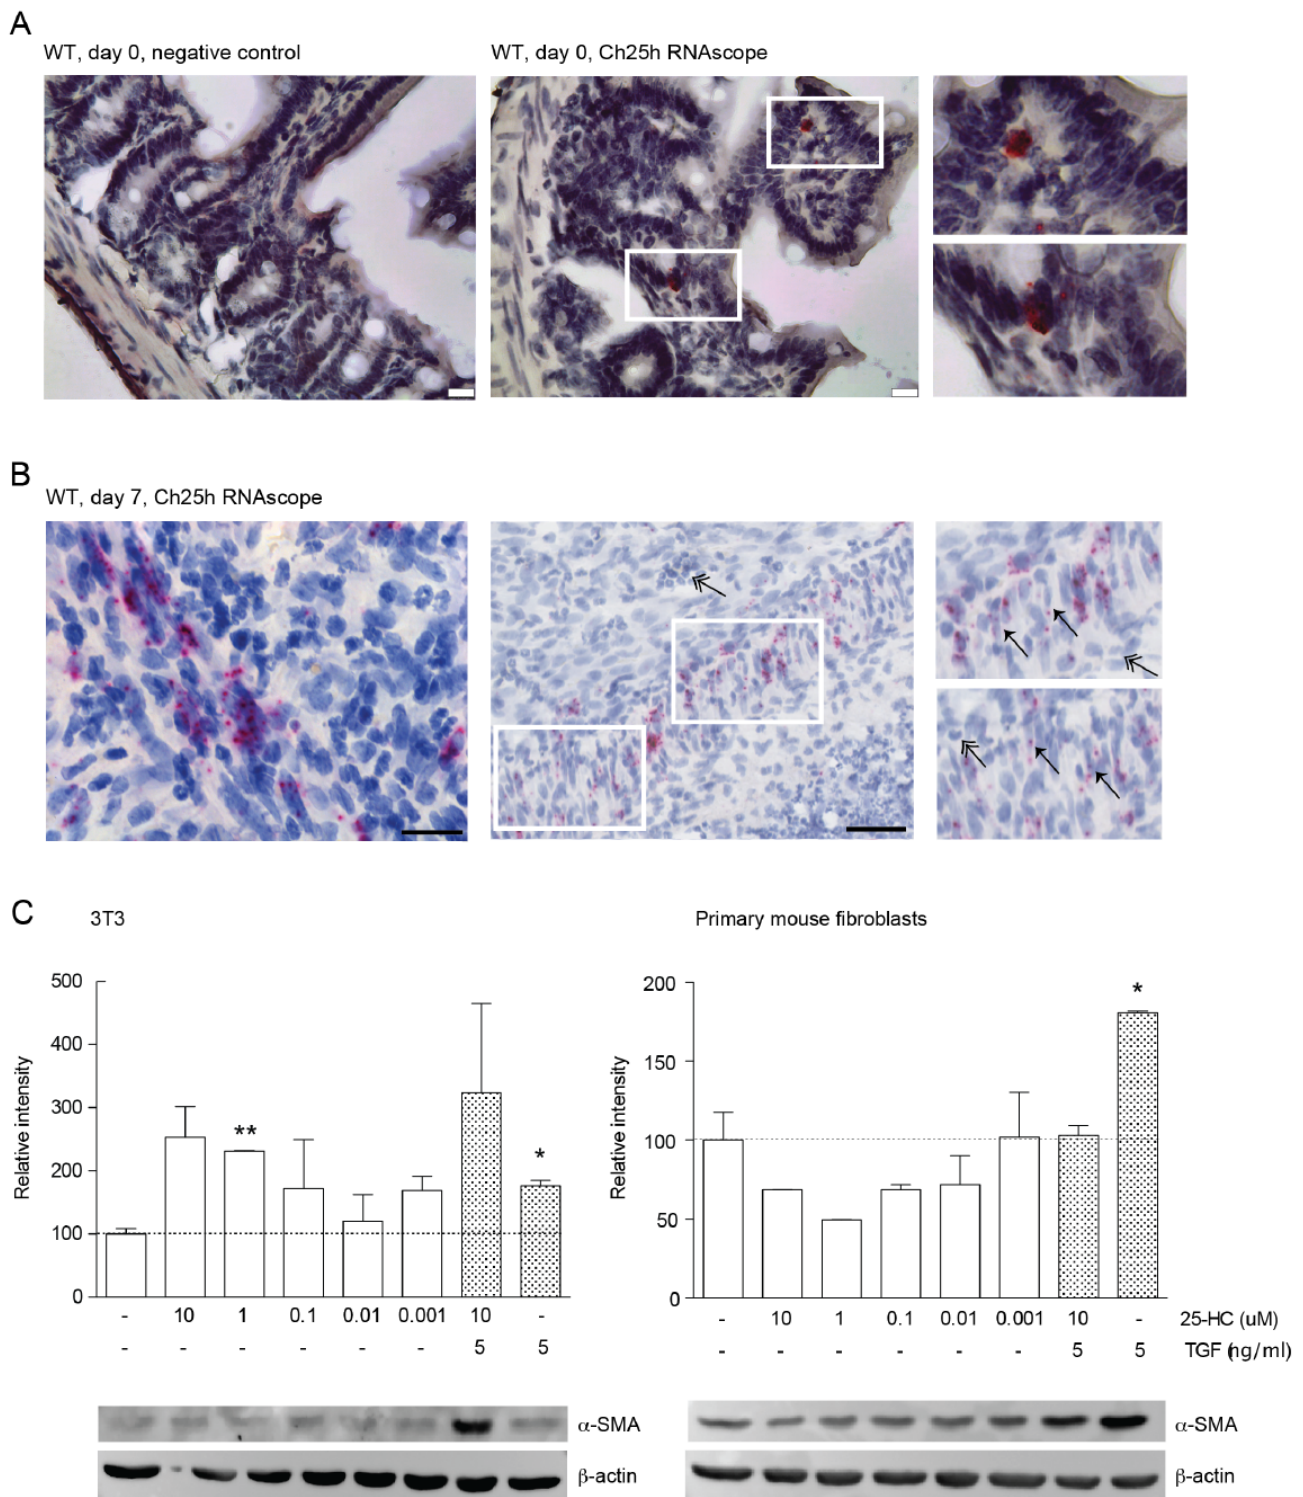

**Figure 7**

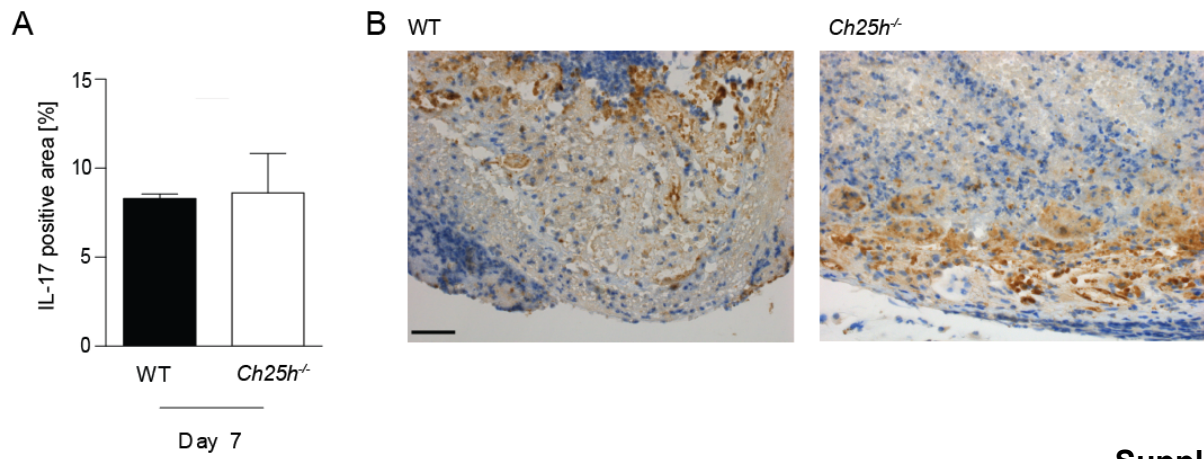

**Suppl. Figure 1**

**A**  
*Ch25h<sup>-/-</sup>*, day 0, Ch25h RNAscope

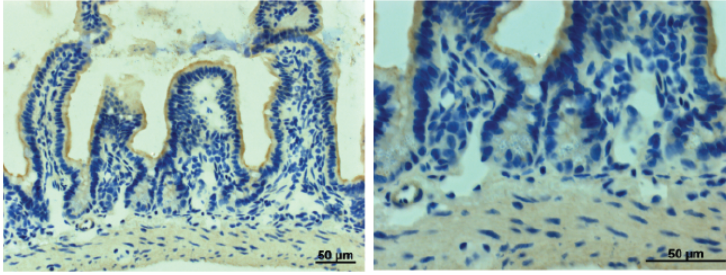

**Suppl. Figure 2**

|                                                           | <b>Crohn's disease<br/>(n=8)</b> | <b>Control<br/>(n=4)</b> |
|-----------------------------------------------------------|----------------------------------|--------------------------|
| <b>General</b>                                            |                                  |                          |
| Gender, % female                                          | 8 (100%)                         | 2 (50%)                  |
| Age at sample, years (mean, min-max)                      | 34.7 (21.0-34.7)                 | 73.1 (69.1-78.2)         |
| Disease duration, years, (mean, min-max)                  | 8.6 (0.8-35.2)                   | NA                       |
| <b>Montreal age at diagnosis (n (%))</b>                  |                                  |                          |
| 17-40 years (A2)                                          | 8 (100%)                         | NA                       |
| <b>Montreal disease behavior (n (%))</b>                  |                                  |                          |
| Stricturing disease (B2)                                  | 8 (100%)                         | NA                       |
| <b>Disease location (n (%))</b>                           |                                  |                          |
| Terminal ileum (L1)                                       | 4 (50%)                          | NA                       |
| Ileocolon (L3)                                            | 4 (50%)                          |                          |
| <b>C-reactive protein before operation (n (%))</b>        |                                  |                          |
| C-reactive protein >5mg/L                                 | 2 (25%)                          | NA                       |
| C-reactive protein <5mg/L                                 | 4 (50%)                          |                          |
| Missing                                                   | 2 (25%)                          |                          |
| <b>Clinical disease activity before operation (n (%))</b> |                                  |                          |
| Disease in remission                                      | 0 (0%)                           | NA                       |
| Mild disease                                              | 1 (12.5%)                        |                          |
| Moderate disease                                          | 4 (50%)                          |                          |
| Severe disease                                            | 3 (37.5%)                        |                          |
| <b>Medication (n (%))</b>                                 |                                  |                          |
| Corticosteroids                                           | 4 (50%)                          | NA                       |
| Azathioprine/6-mercaptopurine                             | 3 (37.5%)                        |                          |
| Anti-TNF $\alpha$                                         | 1 (12.5%)                        |                          |
| Anti-IL12/23                                              | 1 (12.5%)                        |                          |

**Table 1: Characteristics of patients with Crohn's disease and controls.** NA: Non-applicable

| Name         | Clone    | Reactivity   | Tag   |
|--------------|----------|--------------|-------|
| Ly6G         | 1A8      | mouse        | 141Pr |
| CD11c        | N418     | mouse        | 142Nd |
| CD115        | AFS98    | mouse        | 144Nd |
| CD69         | H1.2F3   | mouse        | 145Nd |
| CD45         | 30-F11   | mouse        | 147Sm |
| CD11b (MAC1) | M1/70    | mouse        | 148Nd |
| CD19         | 6D5      | mouse        | 149Sm |
| Ly6C         | HK1.4    | mouse        | 150Nd |
| CD25         | 3C7      | mouse        | 151Eu |
| CD3e         | 145-2C11 | mouse        | 152Sm |
| CD335, NKp46 | 29A1.4   | mouse        | 153Eu |
| CD62L        | MEL-14   | mouse        | 160Gd |
| CCR7         | 4B12     | mouse        | 163Dy |
| CD8a         | 53-6.7   | mouse        | 168Er |
| TCR $\beta$  | H57-597  | mouse        | 169Tm |
| NK1.1        | PK136    | mouse        | 170Er |
| CD44         | IM7      | mouse, human | 171Yb |
| CD4          | RM4-5    | mouse        | 172Yb |
| I-A/I-E      | M5/144   | mouse        | 174Yb |
| B220         | RA3-6B2  | mouse        | 176Yb |

**Table 2: Antibodies used for CyTOF analysis.** All antibodies were pre-labelled (Fluidigm).
